# Supplementary material for: Estimating Radiative Forcing Efficiency of Dust Aerosol Based on Direct Satellite Observations: Case Studies over the Sahara Desert and Taklimakan Desert
Source: Copernicus journal article supplement (doi:10.5194/acp-2020-1113), 2021-01-14
Supplement: Supplementary file [file acp-2020-1113-AC3-supplement.pdf]

## **Responses to the comments**

Dear Reviewer,

Thank you for carefully reviewing our manuscript. The comments and suggestions have helped us to improve the paper.

Following these comments and suggestions, we take a lot of efforts to optimize the structure of the manuscript, add the explanation and description on important parameters and conditions of our research, re-draw the most of the imaging and correct the grammatical errors in the article to meet the reviewer's suggestion, and modify the inaccurate information to avoid the ambiguity.

We response every comments sentence by sentence. Please find the comments in blue italics and our reply in black.

## General comments:

1. Dust aerosol is the object of this study. The authors should elaborate how to distinguish dust particles from other kinds of aerosols. The criteria are important to make sure that the estimated DRFE in this study is for dust aerosols. The authors declared that they chose the cases of dust storms in the Sahara and the Taklimakan deserts. However, the aerosol loadings were very low for most dust storm cases in Table 1 of the manuscript (with aerosol optical depth at  $0.55 \mu\text{m}$  as low as 0.11). It is not completely convincing. The authors need to provide evidence that the estimated direct radiation effect of dust aerosol (DRE<sub>dust</sub>) and DRFE<sub>dust</sub> in this study were “real” for dust.

**Reply:** According to the AERONET site information, the Tamanrasset site is located on the roof of the Regional Meteorological Center (Direction Miteo Regional Sud, Office National de la Miteorologie, Algeria) at Tamanrasset. This area, free of industrial activities, is in the highlands of the Algerian Sahara. Tamanrasset and Kashi sites are similar in land surface type, altitude, and climate. Kashi locates in the vicinity of the Taklimakan Desert, represents a place affected by dust aerosols transported from the Taklimakan Desert (Li et al., 2020). Thus, **the major aerosol over Tamanrasset and Kashi is dust aerosol, the anthropogenic and marine aerosols have little contribution to total aerosol optical depth (AOD)**, especially during dust storms.

Moreover, the focuses of our study are the differences in the dust microphysical properties from different dust source regions and the impacts of the dust microphysical properties, the microphysical properties derived from Aeronet inversion products in this study. Aeronet inversion microphysical properties products are microphysical properties of mixed aerosols. In order to corresponding the results from satellite observations and model simulations, we use AOD retrieved by MODIS as the AOD of dust aerosols in this study. Previous studies also using the AOD derived from direct observations to estimate DRFE<sub>dust</sub> during dust storms (Zhang and Christopher, 2003; Xia and Zong, 2009; Li et al., 2020; Li et al., 2004; Jose et al., 2016a; Garc á et al., 2012), we used the results of these studies validate our results in the paper. Thus, in order to **make the results comparable to these studies**, we also use AOD derived from direct observations to estimate DRFE<sub>dust</sub>.

We have added the explanation of the assume that all aerosols are dust aerosol in dust storms. It has been written as “Since Sahara desert and Taklimakan desert free of industrial activities, the major aerosol over Sahara desert and Taklimakan desert is dust aerosol, the anthropogenic and marine aerosols have little contribution to total AOD, especially during dust storms. Thus, we directly use the AOD retrieved by MODIS to estimate DRFE<sub>dust</sub> during dust storms in this study.”. Please see Lines 253-256 in Page 11-12 of the revised manuscript.

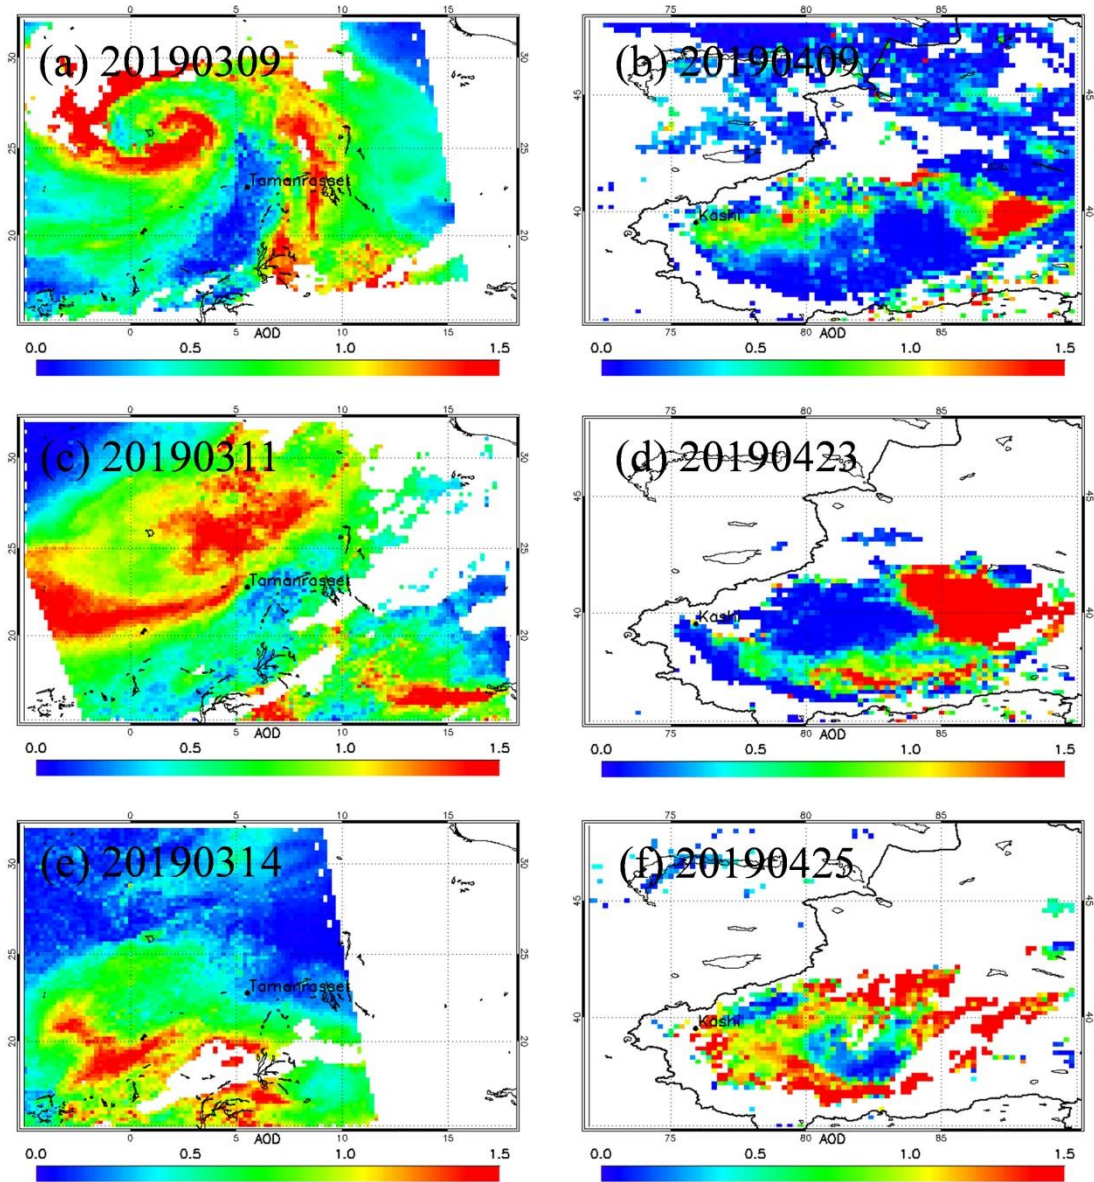

**Figure 1: AOD at  $0.55 \mu\text{m}$  ( $\tau_{550}$ ) of the dust storm in March 2019 over Sahara desert and that in April 2019 over Taklimakan desert.**

For the dust loading, MODIS L2 deep blue AOD product of the dust storm in March 2019 over Tamanrasset and that in April 2019 over Kashi are shown in Fig. 1. The missing data are shown in white; the high dust loading regions are shown in red; the low dust loading regions are shown in blue. Fig. 1 shows that there are heavy dust storms over Sahara desert and Taklimakan desert, the dust storm regions mainly with AOD great than 1.0 detected by MODIS, the edge regions of dust storm also has relatively high AOD value (with AOD great than 0.5), and clear-sky (low dust loading) regions mainly has AOD close to 0. That is because the research regions (Sahara desert and Taklimakan desert) of this study are free of industrial activities, and far from ocean, anthropogenic and marine aerosols have little contribution to AOD. Therefore, the aerosols in this study were “real” for dust.

In previous study, we found that  $DRE_{\text{dust}}$  is significantly influenced by LSA (land surface albedo) and SZA (solar zenith angle) (Tian et al., 2019). To avoid the influence of the LSA and SZA in estimating the  $DRFE_{\text{dust}}$ , we estimate  $DRFE_{\text{dust}}$  using pixels with similar LSA and SZA.

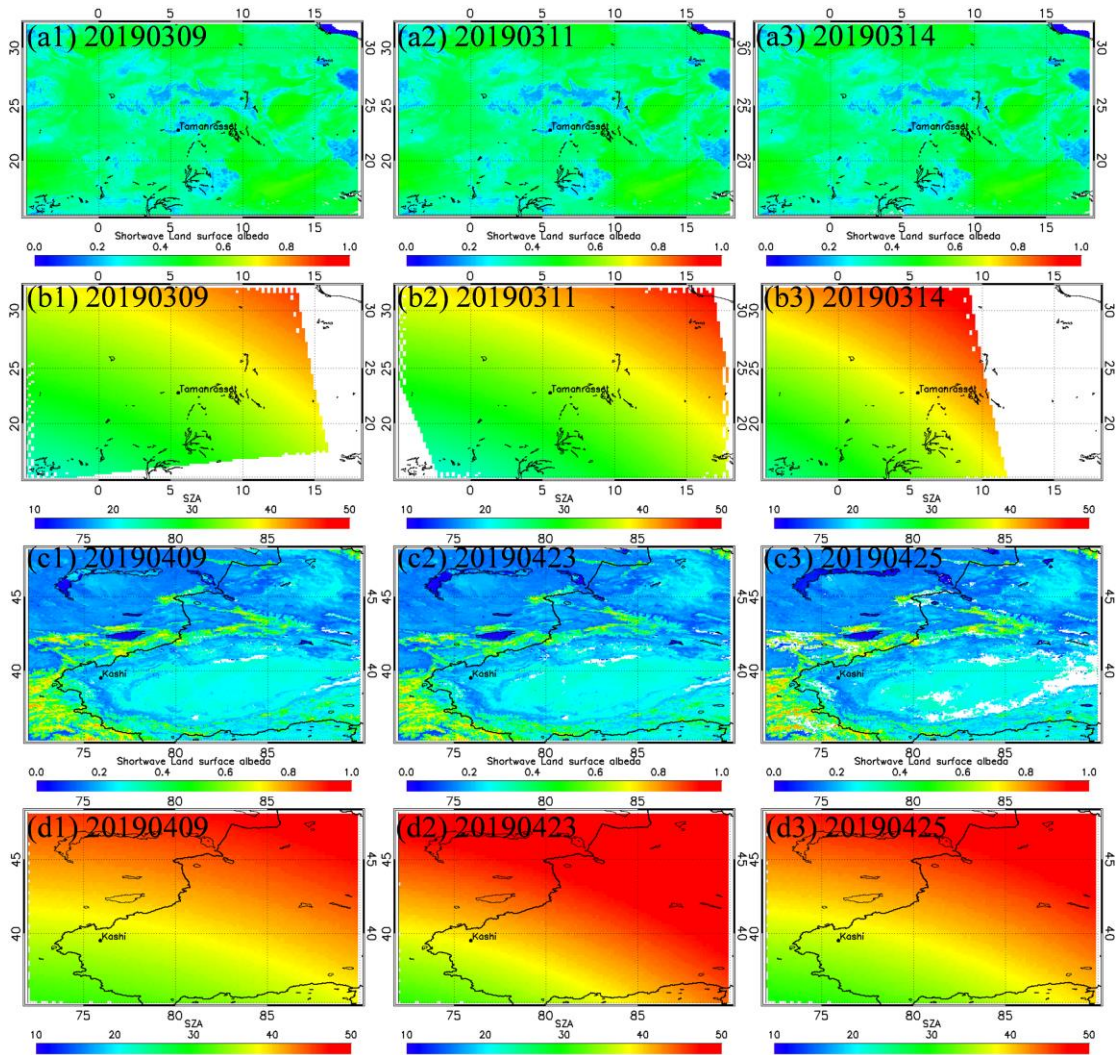

**Figure 2: SW LSA and SZA over Sahara desert and Taklimakan desert derived from AQUA/MODIS.**

Fig. 2 shows the LSA and the SZA observed by the AQUA satellite over Sahara desert (Fig. 2(a1)-(a3) and Fig. 2(b1)-(b3)) and Taklimakan desert (Fig. 2(c1)-(c3) and Fig. 2(d1)-(d3)) during dust storms. The cloud-free pixels with AOD great than 0.1, the LSA of 0.16–0.20 and SZA of 32–38 degrees are chosen to derive the  $DRFE_{dust}$ . We can found that the regions have similar LSA and SZA with Tamanrasset and Kashi not always in the heavy dust storm regions. And **some low dust loading regions also can be used in regression to estimate the  $DRFE_{dust}$ .**

2. In this study, the authors proposed the satellite-based equi-albedo method to estimate the radiative forcing effects and efficiencies of dust aerosols. The authors also asserted that this method has unique advantage as there is no need to consider the microphysical properties of dust. This method is on the basis of an assumption—the shortwave (SW) radiative fluxes at the top of atmosphere (TOA) of the clear sky are equal over the regions with similar land surface albedo (LSA) and solar zenith angle (SZA). On one hand, the influences of atmospheric profiles (including the vertical distributions of water vapor density and ozone density) on the upward solar radiative flux at TOA are obvious. They cannot be ignored relative to the magnitude of dust radiative forcing. The atmospheric profiles can be very different for different “clear sky” conditions over the same region. So, the assumption doesn't sound reasonable. The authors should prove it. On the other hand, “similar” is an ambiguous criterion.



The authors should clarify the conditions of LSA and SZA quantitatively, which make the above assumption tenable.

**Reply:** Thank you for the valuable suggestion. We tested the sensitivity of radiative flux at the top of atmosphere to changes in atmosphere profile with SBDART radiative transfer model. For the atmospheric profiles, we use the standard atmospheric profiles in the SBDART model (atmospheric profiles are listed in Table 1), and AOD=0.1, LSA=0.3, SZA=30 ° used as the input parameters.

**Table 1: Shortwave flux at the top of atmosphere as Function of atmospheric profile from Radiative Transfer Calculations**

| ATMOSPHERIC PROFILE | water vapor (g/cm2) | total ozone(atm-cm) | below_10km ozone(atm-cm) | TOA radiative flux (Wm <sup>-2</sup> ) |
|---------------------|---------------------|---------------------|--------------------------|----------------------------------------|
| TROPICAL            | 4.117               | 0.253               | 0.0216                   | 213                                    |
| MID-LATITUDE SUMMER | 2.924               | 0.324               | 0.0325                   | 217                                    |
| MID-LATITUDE WINTER | 0.854               | 0.403               | 0.0336                   | 232                                    |
| SUB-ARCTIC SUMMER   | 2.085               | 0.350               | 0.0346                   | 221                                    |
| SUB-ARCTIC WINTER   | 0.418               | 0.486               | 0.0340                   | 238                                    |
| US62                | 1.418               | 0.349               | 0.0252                   | 227                                    |

Table 1 lists the shortwave flux at the top of atmosphere as function of atmospheric profile. The sensitivity test result shows that the influence of the atmospheric profile on Radiative flux at the top of atmosphere is insignificant (with difference less than 4.5%).

Therefore, **it is reasonable to assume the atmospheric profile have few influence of SW DRE in one scene of satellite data.** And the atmospheric profile variety caused Radiative flux difference will not affect  $DRE_{dust}$ , because the difference will be eliminate when  $F_{clr}$  subtracting  $F_{dust}$ . The atmospheric profile, water vapor and height of dust layer have insignificant influence on  $DRFE_{dust}$  at the TOA. **The uncertainties caused by the water vapor and height of dust layer also estimated in the manuscript.** Please see Lines 349-375 in Page 17-19 of the revised manuscript.

In this research we attempt to eliminate the influence of LSA, and to estimate the clear-sky shortwave radiative flux over dust storm region, based on the assumption that  $F_{clr}$  is the same as the clear-sky TOA radiative flux in dust storm regions, where the LSA and SZA are similar with that in the dust storm regions ( $LSA \approx LSA_{dust}$  &  $SZA \approx SZA_{dust}$ ). Therefore, it can be considered to be in the same condition when the difference between LSA is less than 0.01, and the difference between SZA is less than 0.2 °. This keeps good consistency of  $F_{clr}$  between clear and dust storm area, and ensures that enough pixels could match the condition (Tian et al., 2019).

To avoid the influence of the LSA and SZA in estimating the  $DRFE_{dust}$ , we estimate  $DRFE_{dust}$  using pixels with similar LSA and SZA. Fig. 2 shows LSA between 0.16-0.20, and SZA between 32 °-38 ° around Tamanrasset and Kashi during dust storms. Therefore, The cloud-free pixels with AOD great than 0.1, and with the LSA of 0.16–0.20 and the SZA of 32–38 degrees are chosen to estimate the  $DRFE_{dust}$ .

We clarify the conditions of LSA and SZA quantitatively in the revised manuscript. Please see Lines 129-133 in Page 6, and Lines 320-322 in Page 15 of the revised manuscript.

3. Some important parameters and conditions were not defined clearly in this paper. For example, (1) the effects of dust aerosol particles could exhibit opposite warming or cooling effects at the TOA, in the atmosphere, or at the surface. The authors did not specify the DRFE<sub>dust</sub> that was estimated at at which level (i.e., at the TOA, in the atmosphere, or at the surface) in this manuscript. Although the observations of satellites are conducted at the top of the atmosphere, it does not mean DRFE<sub>dust</sub> only can be calculated at the TOA. (2) The direction of radiative flux (upwelling or downwelling) was also not mentioned throughout the context, which is vital information for calculating of the DRE<sub>dust</sub> and DRFE<sub>dust</sub>. (3) The radiative forcing efficiency is defined as the rate at which the atmosphere is forced per unit of aerosol optical depth (AOD) taken at a reference wavelength. The reference wavelength is an important information considering that AOD varies with wavelength. The 550 nm and 500 nm are generally adopted in literature. The value of DRFE<sub>dust</sub> will be changed by taken different wavelength as reference. However, it was also not specified in this study. (4) The “clear sky” condition is a basic condition for estimating the DRFE<sub>dust</sub>. But it was not clearly stated in the manuscript. Normally, the clear sky is identified as the cloud-free and low aerosol loading sky condition, other than the sky without cloud and aerosol particles. It is necessary for the authors to specify the condition of clear sky in this study. (5) The wavelength range of SW should also be given. The authors used different broadband satellite produces (e.g., land surface albedo, radiative flux) in the SW range. SW DRFE<sub>dust</sub> from this study and some different previous studies were also adopted for comparison. The ranges of spectral integration in SW were not exactly same for different previous studies (e.g., 0.2-4 $\mu$ m, 0.28-3 $\mu$ m, or 0.3-5 $\mu$ m). Therefore, the authors should also specify the ranges of shortwave for various parameters in this study, which are surely contributed to the differences of the DRFE<sub>dust</sub> results. (6) It is well-known that the instantaneous aerosol radiative forcing effects and efficiency change obviously over time. As I understand it, the instantaneous DRE and DRFE were estimated at the transit moment of the Aqua in this study. The time and sky conditions corresponding to the DRE<sub>dust</sub> and DRFE<sub>dust</sub> results of the Taklimakan Desert and the Sahara Desert should be illustrated. It is important for the comparison among different results of this study and with other previous studies. (7) The LSA is a key factor which influences the Earth-atmosphere radiation budget. LSA is calculated from the white-sky albedo (WSA) and black-sky albedo (BSA) weighted by the fraction of diffuse skylight radiation. However, only WSA was shown in the paper. The BSA which is as a function of incident solar direction, has never been mentioned. The authors should give more details on how to obtain the LSA and its influence on the assumption of the equi-albedo method in this study.

**Reply:** Thank you for these valuable suggestions.

- (1) In this study we estimate DRFE<sub>dust</sub> at the top of atmosphere (TOA). Satellites can directly observe the radiation budget of the earth at the TOA (Wielicki et al., 1998; Satheesh and Ramanathan, 2000), and the remote-sensing technique for the AOD has been developed (Remer et al., 2005; Hsu et al., 2004). Therefore, it is possible to evaluate the DRFE<sub>dust</sub> at the TOA directly from satellite observations. Meanwhile, the DRFE<sub>dust</sub> at the TOA also simulated by RTM. We have added the state of the DRFE<sub>dust</sub> level in the manuscript. Please see Lines 91-108 in Page 4, Line 198 and Lines 202-205 in Page 8, Line 310 and Lines 316-323 in Page 15 of the revised manuscript.
- (2) The satellite-based equi-albedo method and the RTM are both used to estimate the DRFE<sub>dust</sub> in this study. Therefore, the upward radiative flux at the TOA were estimated in this study. We have added the state of the radiative flux direction in the manuscript. Please see Line 120 in Page 5 and Line 127 in Page 6 of the revised manuscript.
- (3) In this paper, the deep blue AOD (0.55 $\mu$ m) data are used to discriminate the dust storm regions,

and the deep blue algorithm retrieval AOD at  $0.55\mu\text{m}$ . We have mentioned the wavelength of AOD in the description of MODIS products (Please see section 3.1).

- (4) The TOA radiative flux in the clear-sky area is derived from CERES pixels in cloud-free and non-aerosol conditions that have AOD smaller than 0.02, as determined by the MODIS data in Christopher et al. (2002) method (Christopher and Zhang, 2002). It is too small for the deep blue algorithm to be retrieved. In the equi-albedo method we set the cloud-free pixels with AOD smaller than 0.1 as the clear-sky pixels (Tian et al., 2019). We clarify the condition of clear sky in this study. Please see Lines 129-130 in Page 6 of the revised manuscript.
- (5) Thank you for your reminding. Here the instantaneous SW channel ( $0.3\text{--}5.0\ \mu\text{m}$ ) radiative flux at the TOA from CERES SSF level 2 dataset and SW channel ( $0.3\text{--}5.0\ \mu\text{m}$ ) land surface albedo product (MCD43) were used. Other studies estimated  $\text{DRFE}_{\text{dust}}$  with the broadband wavelength in  $0.3\text{--}5.0\ \mu\text{m}$ , which consistent with our study. Garc ía et al. (2012) estimated  $\text{DRFE}_{\text{dust}}$  with the broadband wavelength in  $0.2\text{--}4.0\ \mu\text{m}$ , to keep the scientific and rigorous of the research we do not compared the  $\text{DRFE}_{\text{dust}}$  derived from works of Garc ía et al. (2012) with our results any longer. We have revised and clarified the the wavelength range of SW in the manuscript. Please see Line 265 and Line 273 in Page 12, Lines 496-506 in Page 27 of the revised manuscript.
- (6) It is true that the instantaneous aerosol radiative forcing effects and efficiency change obviously over time. That mainly caused by the changes of SZA over time, and SZA have important influence on SW  $\text{DRE}_{\text{dust}}$  and  $\text{DRFE}_{\text{dust}}$ . To avoid the influence of the SZA in estimating the SW  $\text{DRFE}_{\text{dust}}$ , we estimate  $\text{DRFE}_{\text{dust}}$  using pixels with similar SZA. Therefore, the transit time of AQUA satellite would not influence on the estimation of  $\text{DRFE}_{\text{dust}}$ . We also added the description of the time of AQUA satellite cross over Taklimakan Desert and the Sahara Desert to meet the reviewer's suggestion. Please see Lines 235-236 in Page 10 of the revised manuscript.

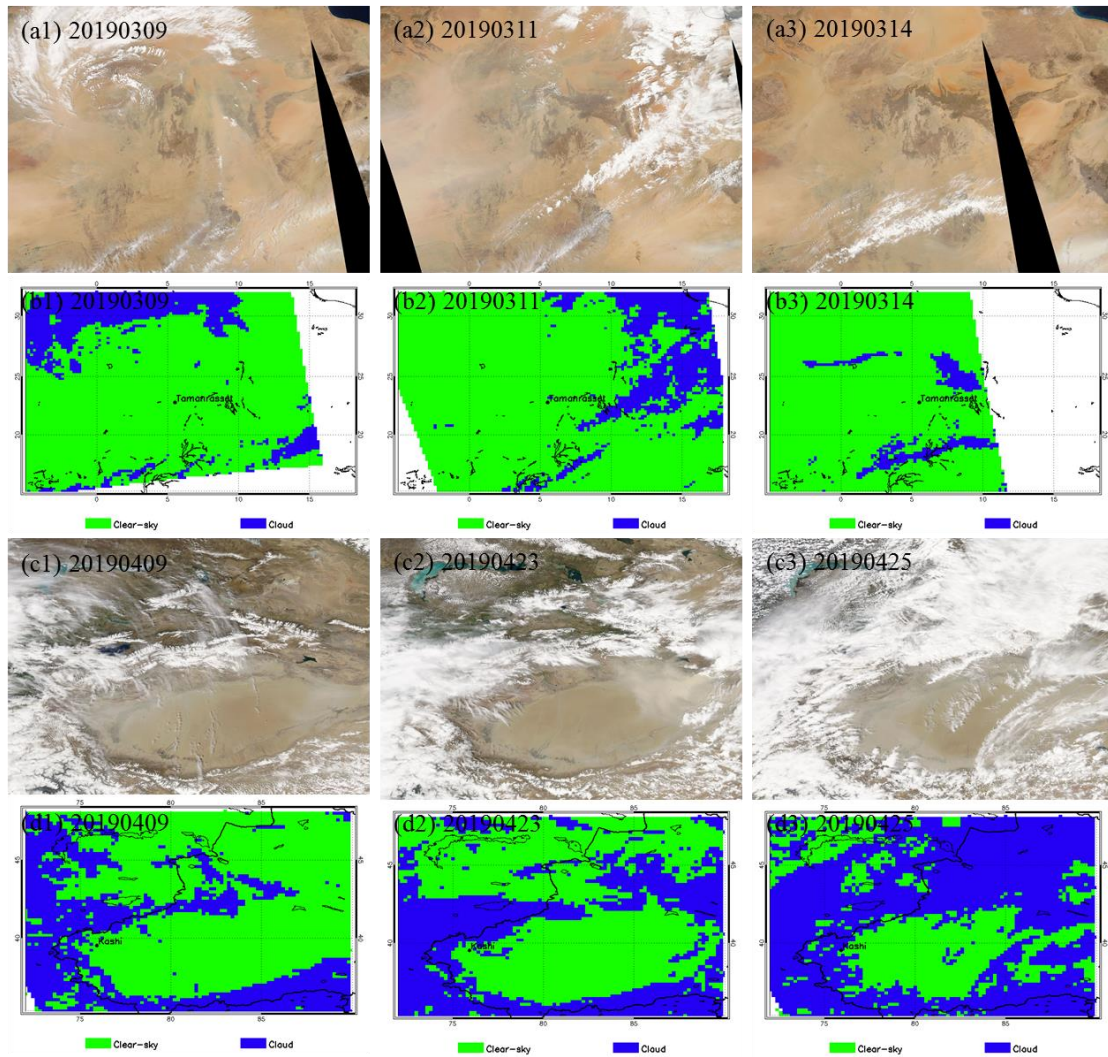

**Figure 3: True color images and cloud detections from AQUA/MODIS observations.**

Fig. 3 shows the true color images (Fig. 4(a1)-(a3) over Sahara desert, and Fig. 4(c1)-(c3) over Taklimakan desert) and cloud detections (Fig. 4(c1)-(c3) over Sahara desert, and Fig. 4(d1)-(d3) over Taklimakan desert) from AQUA/MODIS observations. The true color images and cloud detections clearly show the sky conditions of Taklimakan Desert and the Sahara Desert during these dust storms, Tamanrasset site and Kashi site were not covered by clouds during these dust storms. Please see Figure 4 in Page 11 of the revised manuscript.

- (7) The shortwave black-sky albedo (BSA) and white-sky albedo (WSA) are provided by the MODIS BRDF/Albedo Science Data Product (MCD43C3).

BSA (directional hemispherical reflectance) is defined as albedo in the absence of a diffuse component and is a function of SZA. WSA (bihemispherical reflectance) is defined as albedo in the absence of a direct component when the diffuse component is isotropic. BSA and WSA mark the extreme cases of completely direct and completely diffuse illumination. Here, the LSA is calculated by interpolating from BSA and WSA (Lewis and Barnsley, 1994; Schaaf et al., 2002). In this study we estimate  $DRFE_{dust}$  in a restricted range of SZA. Thus, the LSA, BSA and WSA show good coincidence

We clarify the LSA we used in this study. Please see Lines 265-268 in Page 12 of the revised manuscript.



4. The authors declared that there are only sparse in-situ measurements in the main dust source regions. One of the obvious advantages of satellite measurements is to obtain the continuous spatial information in a large region. However, only the results of DRE<sub>dust</sub> and DRFE<sub>dust</sub> at a few pixels in the Taklimakan Desert and the Sahara Desert were estimated and shown in this manuscript. Readers may prefer to see the results of dust radiative forcing over the whole regions obtained by the satellite-based method in this study. I suggest the authors giving more results in Figures 7,9 and 10.

**Reply:** This suggestion is pretty valuable. In previous study, we found that DRE<sub>dust</sub> is significantly influenced by LSA and SZA (Tian et al., 2019). To avoid the influence of the LSA and SZA in estimating the DRFE<sub>dust</sub>, we estimate DRFE<sub>dust</sub> using pixels with similar LSA and SZA. We have re-plotted all the available data of DRE<sub>dust</sub>, integrated water vapor and SBDART derived SW fluxes in these distribution maps, and put black borders around the chosen pixels in these figures.

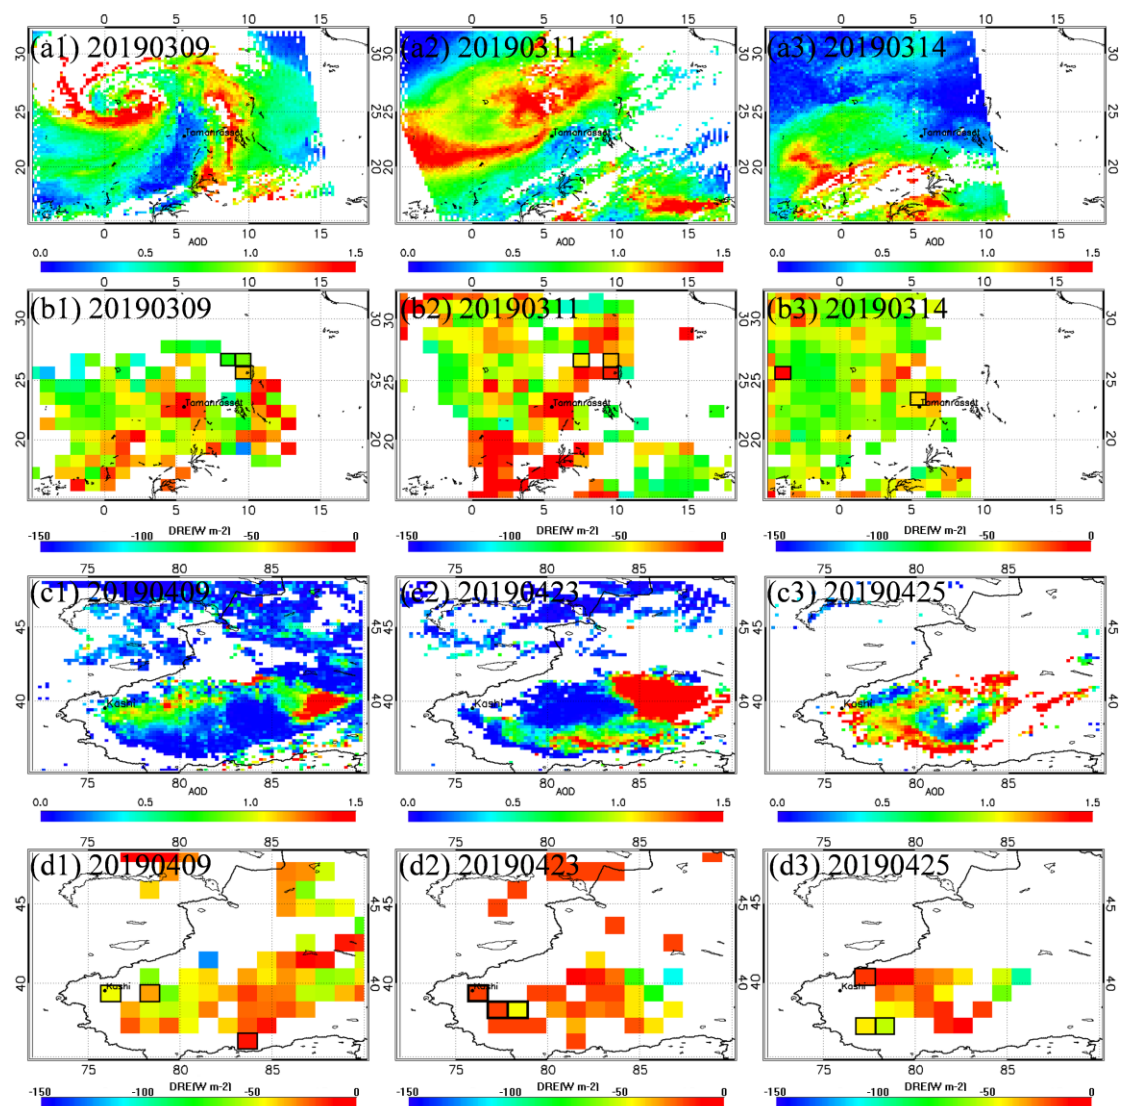

**Figure 4:** AOD and DRE<sub>dust</sub> of dust storms over the Sahara Desert in March 2019 and over the Taklimakan Desert in April 2019.

Fig.4 shows that AOD and DRE<sub>dust</sub> plotted in the same image, the high dust aerosol loading regions show significant negative radiative forcing. It indicates that the dust aerosol loading is

negatively correlated with the  $DRE_{dust}$  in these dust storm events. Thus, dust aerosols have a negative radiative effect in the SW spectrum.

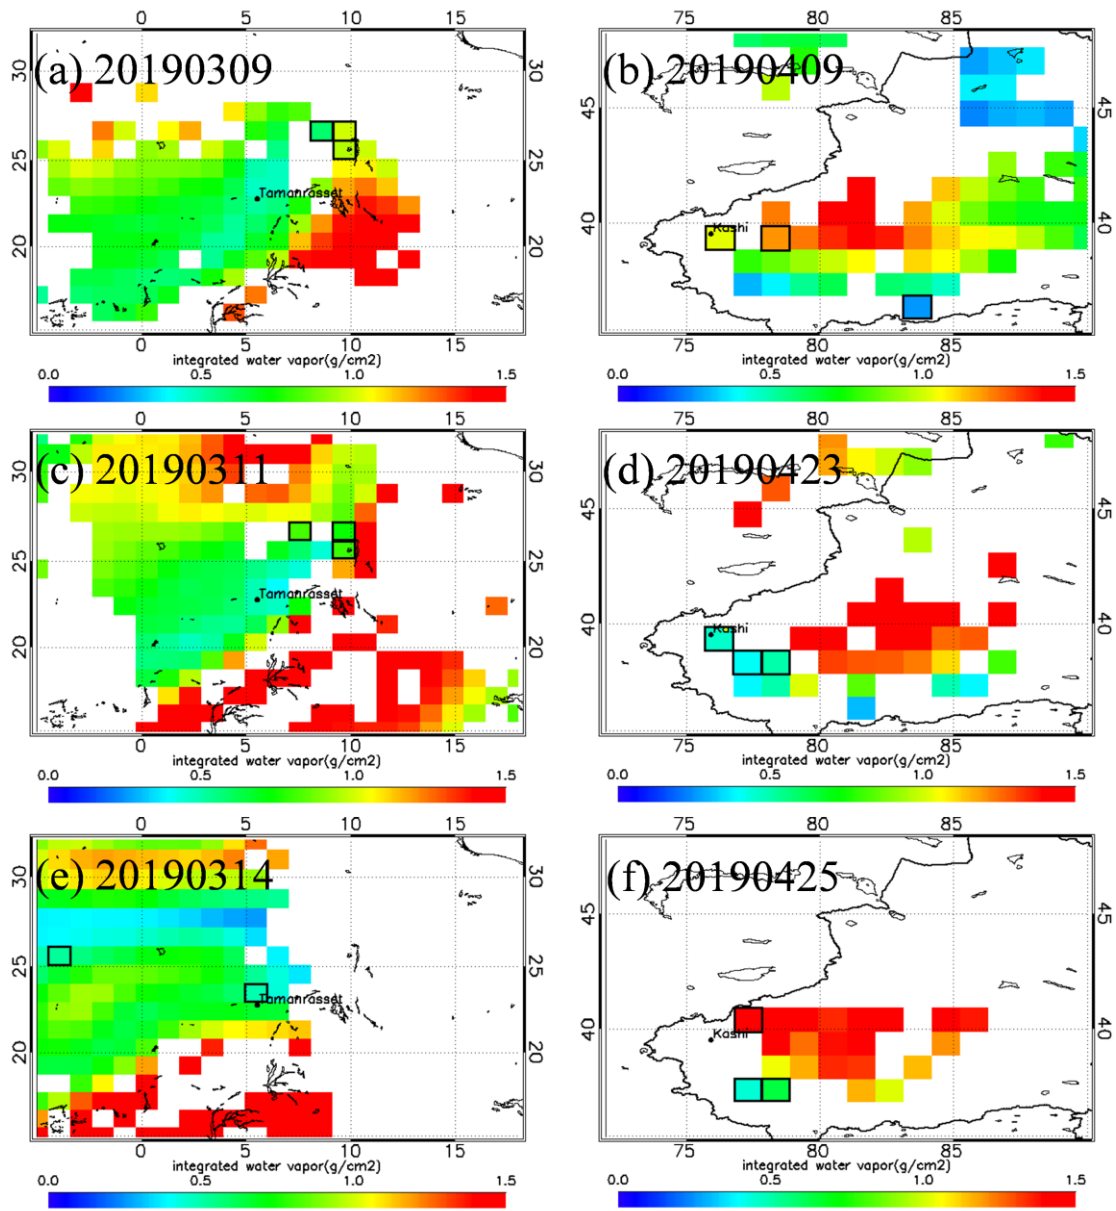

**Figure 5: Integrated water vapor ( $g/cm^2$ ) from European Centre for Medium-range Weather Forecasts (ECMWF) reanalysis dataset over the Sahara Desert in March 2019 and over the Taklimakan Desert in April 2019.**

Fig.8 shows the integrated water vapor from ECMWF reanalysis dataset over the Sahara Desert in March 2019 and over the Taklimakan Desert on April 2019. The grids surrounded by black border are the chosen pixels to estimate the  $DRFE_{dust}$ . The integrated water vapor varies little over different research areas, and the mean differences of chosen pixels are  $0.51g/cm^2$  and  $0.18g/cm^2$  over the Sahara Desert and the Taklimakan Desert, respectively.

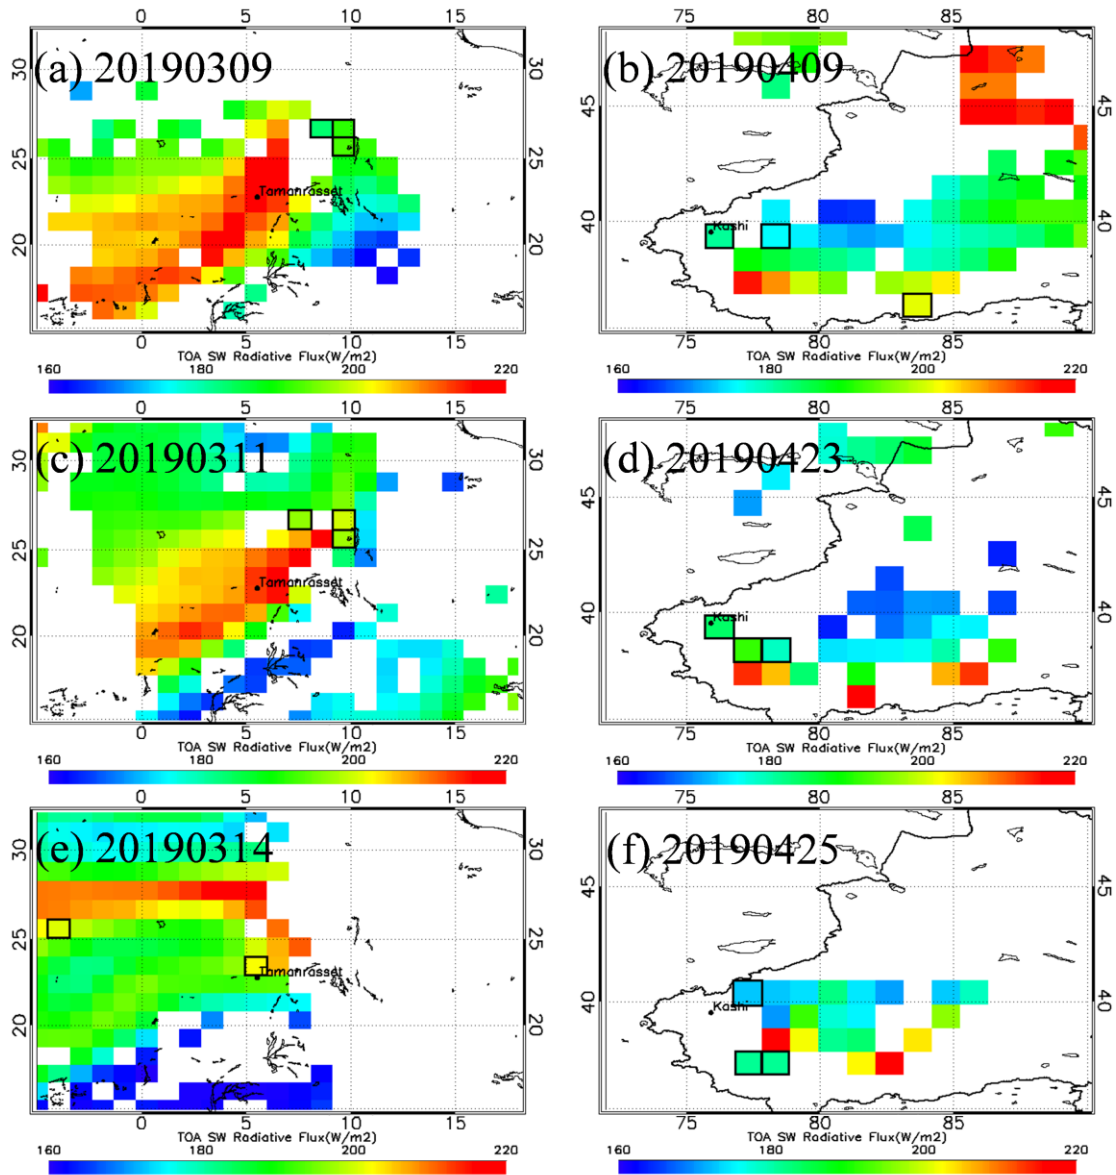

**Figure 6: SBDART simulated clear-sky TOA radiative flux by using integrated water vapor ( $\text{g}/\text{cm}^2$ ) from ECMWF reanalysis dataset over the Sahara Desert in March 2019 and over the Taklimakan Desert in April 2019.**

Fig.6 shows SBDART simulated clear-sky TOA radiative flux using integrated water vapor from ECMWF reanalyses dataset on March 2019 over Sahara desert and on April 2019 over Taklimakan desert, and the grids surrounded by black border are the chosen pixels to derive the  $\text{DRFE}_{\text{dust}}$ . The regional mean differences of TOA radiative flux are 2.21% and 0.85% over Sahara desert and Taklimakan desert, respectively.

We re-drewed these distribution maps, and revised in the manuscript. Please see Fig.6 in Page 14, Fig.8 in Page 17, and Fig.9 in Page 18 of the revised manuscript.

5. The authors asserted that “Previous studies proved that the results in this paper are reasonable and reliable”. “Table 2 illustrates the SW  $\text{DRFE}_{\text{dust}}$  of the Sahara Desert and the Taklimakan Desert in

previous studies. Garc ía et al. (2012) evaluated the  $DRFE_{dust}$  based on the GAME model and the AERONET retrievals, which indicated that the mean  $DRFE_{dust}$  is around  $-35 \text{ W m}^{-2} \tau^{-1}$  in the Sahara Desert and  $-45 \text{ W m}^{-2} \tau^{-1}$  in the Taklimakan Desert in similar observational conditions...” (Lines 443-446). However, there was no  $DRFE_{dust}$  result in the Taklimakan Desert in the referred literature. According to Garc ía et al. (2012), only three AERONET stations in Asia (i.e., Sacol, Dalanzadgad and Yulin) were adopted as mineral dust stations in this previous study. None of them located in the Taklimakan Desert (see Figure 1 in Garc ía et al.,2012). The authors need to give a reasonable explanation on the authenticity of the above data. Moreover, the authors also need to pay special attention to that the definitions of the aerosol DRE and DRFE published in the open literature might be very different (e.g., instantaneous value, daily average value, monthly average value, multi-year average value, multi-year monthly average value). Even for the same concept, the difference in statistical method can also lead to the difference in quantity of these values. For example, daily average result is estimated by taking the average of the 24 instantaneous hourly values in some studies, but by taking the average of the instantaneous values throughout the daytime in some other studies. The authors should notice the detail of each  $DRFE_{dust}$  value in the literature. They were not the same in Table 1. So, it is not appropriate to direct compare the values of different results in this table.

**Reply:** Thank you for your reminding.

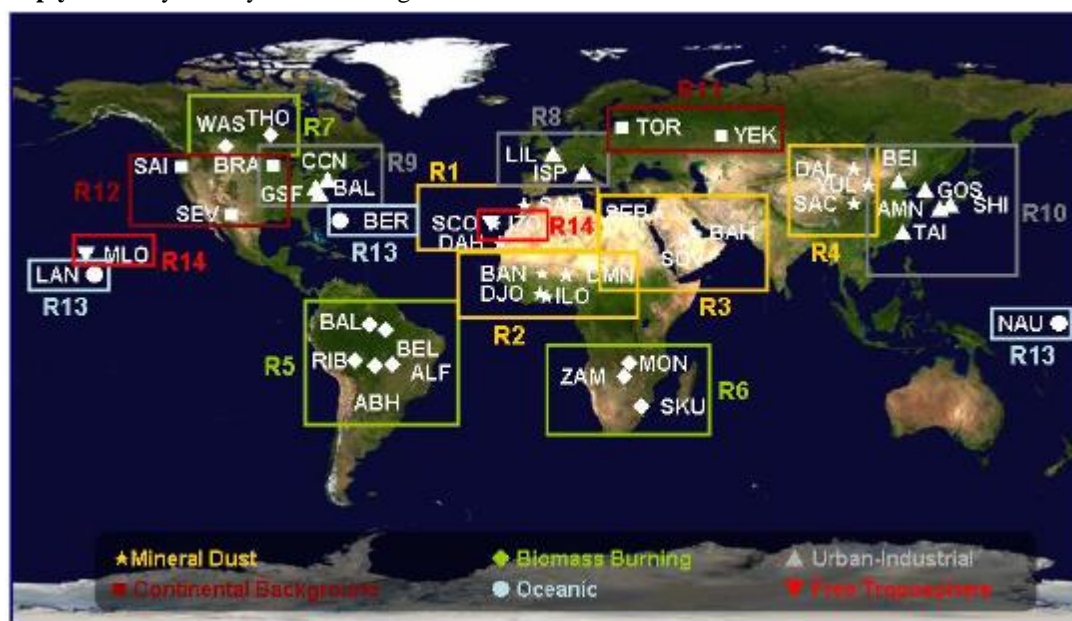

**Figure 7:** The research regions in works of Garc ía et al. (2012)

Fig.7 shows Geographical distribution of the AERONET stations used in works of Garc ía et al. (2012) (Garc ía et al., 2012), these stations were grouped into 14 regions. The region of R4 in Fig.7 contained the Taklimakan Desert, and we compared the  $DRFE_{dust}$  at TOA over R4 ( $\sim -45 \text{ W m}^{-2} \tau^{-1}$ ) with our results.

Following the suggestion, we checked the location of AERONET stations in R4, these stations (Sacol, Dalanzadgad and Yulin) are not in Taklimakan Desert. Moreover, Garc ía et al. (2012) estimated  $DRFE_{dust}$  with the broadband wavelength in  $0.2\text{--}4.0 \mu\text{m}$  which is different from our research ( $0.3\text{--}5.0 \mu\text{m}$ ). Thus, it is not appropriate to direct compare the values of different results. We have revised in the manuscript. Please see Lines 496-507 in Page 27 of the revised manuscript.

Other studies are comparable. We estimated the  $DRFE_{dust}$  of the Taklimakan Desert with the same dust properties referring to the works of Li et al. (2020) (Li et al., 2020), Li et al. (2020) estimated the



instantaneous SW (with the broadband wavelength in 0.2–4.0  $\mu\text{m}$ )  $\text{DRFE}_{\text{dust}}$  around Kashi during dust storms. The  $\text{DRFE}_{\text{dust}}$  derived from works of Li et al. (2020) are around  $-45 \text{ Wm}^{-2}\tau^{-1} \sim 50 \text{ Wm}^{-2}\tau^{-1}$ , this can be directly compared with the result we estimated in the manuscript, and the results are in good agreement with those estimated by the satellite observations in our study.

Furthermore, Li et al. (2004) (Li et al., 2004) and Xia and Zong (2009) (Xia and Zong, 2009) also used the satellite data (with the broadband wavelength in 0.3–5.0  $\mu\text{m}$ ) to estimate the instantaneous SW  $\text{DRFE}_{\text{dust}}$  at TOA.

## More specific comments:

1. Section “1 Introduction”: The authors need to introduce the research status of dust radiative forcing, especially in the Sahara Desert and the Taklimakan Desert. Numerous existing studies have done. The authors need to survey literature and summarized them.

**Reply:** Thanks for the valuable suggestion. Many studies have estimated the  $\text{DRFE}_{\text{dust}}$  in the Sahara Desert and the Taklimakan Desert (Xia and Zong, 2009; Li et al., 2020; Li et al., 2004; Garc á et al., 2012) in different methods and conditions. We have summarized and cited these works in Section 1. Please see Lines 78-90 in Page 3-4 of the revised manuscript.

2. Line 112: The equation of the DRE in this study is not commonly adopted. I can't find such a definition in any of the given references.

**Reply:** The term “radiative forcing” has been employed in the IPCC (Intergovernmental Panel on Climate Change) Assessments to denote an externally imposed perturbation in the radiative energy budget of the Earth’s climate system (Ramaswamy, 2006). Such a perturbation can be brought about by secular changes in the concentrations of radiatively active species (e.g., CO<sub>2</sub>, aerosols), changes in the solar irradiance incident upon the planet. This imbalance in the radiation budget has the potential to lead to changes in climate parameters and thus result in a new equilibrium state of the climate system.

According to the definition of direct radiative effect (DRE) and direct radiative forcing (DRF), the DRE is the instantaneous radiative impact, and the DRF is the change in DRE from preindustrial times to the present day (Heald et al., 2014).

The instantaneous DRF at the top of the atmosphere (TOA) is defined as the difference between clear ( $F_{\text{clr}}$ ) and aerosol ( $F_{\text{aer}}$ ) fluxes in previous studies ( $\text{DRF}_{\text{aer}} = F_{\text{clr}} - F_{\text{aer}}$ ) (Lin et al., 2009; Li et al., 2020; Jose et al., 2016b; Christopher et al., 2006; Christopher and Zhang, 2002; Christopher et al., 2000).

**To keep the description scientific and rigorous, we use DRE instead of DRF** ( $\text{DRE}_{\text{aer}} = F_{\text{clr}} - F_{\text{aer}}$ ) in this study.

3. Line 119 “Based on the assumption, the  $F_{\text{clr}}$  were estimated...”: The authors need to give more details on how to calculate  $F_{\text{clr}}$  based on the satellite observations in the equi-albedo method.

**Reply:** Thanks for the suggestion. In this research we attempt to eliminate the influence of LSA, and to estimate the clear-sky shortwave radiative flux over dust storm region, based on the assumption that  $F_{\text{clr}}$  is the same as the clear-sky TOA radiative flux in dust storm regions, where the LSA and SZA are similar with that in the dust storm regions ( $\text{LSA} \approx \text{LSA}_{\text{dust}}$  &  $\text{SZA} \approx \text{SZA}_{\text{dust}}$ ).

Based on the assumption, we attempt to estimate clear-sky shortwave radiative flux over dust

storm regions, and the steps are as following:

1) TOA radiative flux in the clear-sky area is derived from CERES pixels in cloud-free and non-aerosol conditions that have AOD smaller than 0.02, as determined by the MODIS data in Christopher et al. (2002) method (Christopher and Zhang, 2002). It is too small for the deep blue algorithm to be retrieved. Here we set the pixels with AOD smaller than 0.1 as the clear-sky pixels.

2) Then, in order to eliminate the influence of LSA,  $F_{clr}$  for CERES pixels that have similar LSA and SZA to the dust storm pixel is determined. Different types of land surface may have the similar LSA, we use land cover type data to ensure that the dust-free region and the dust-laden region have similar broadband integrated albedo over same land type.

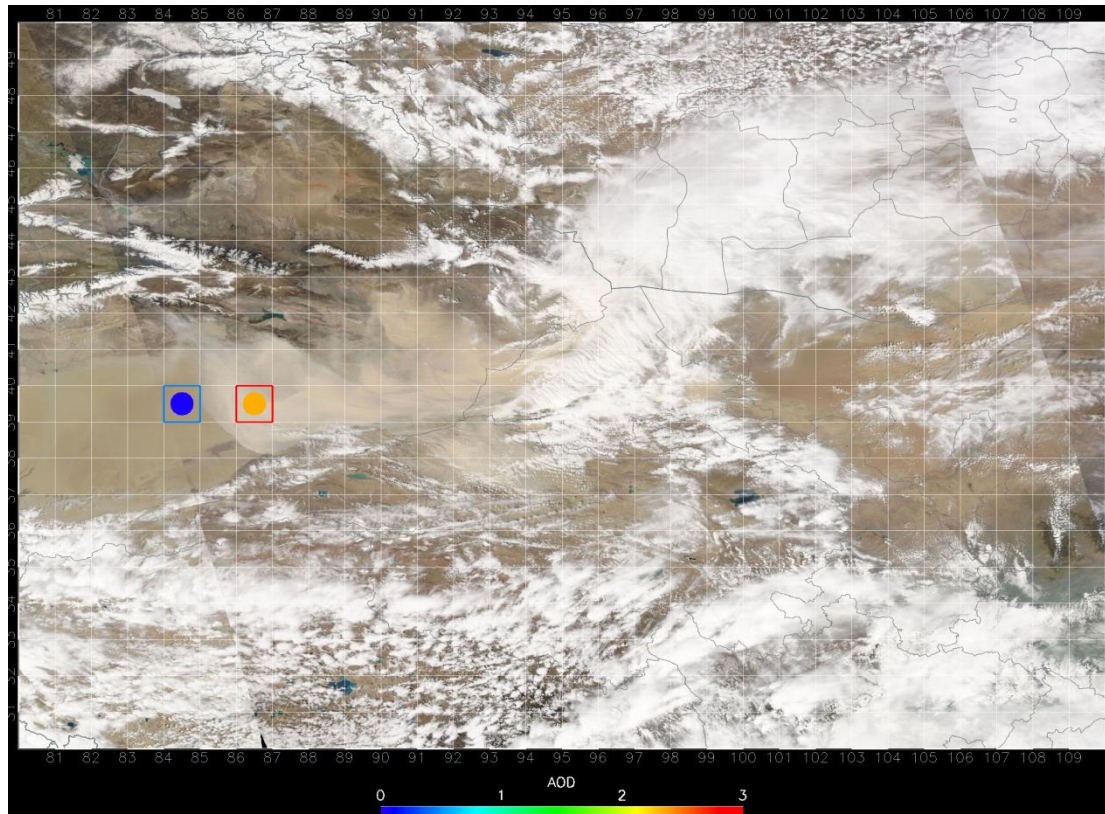

**Figure 8: Dust storm viewed by MODIS Aqua on April 24, 2010. The red square area represents the dust storm pixel, and the blue square area represents the pixel that have similar  $F_{clr}$  with the red square area, based on our assumption. Colored dots in the squares represent the mean AOD (550nm AOD retrieved by MODIS) over square areas respectively. The color of each dot represents the mean AOD value.**

The dust storm occurred on April 24, 2010 can be seen visually by Aqua MODIS (Figure 6). Following the above steps, contemporaneous surface albedo and SZA data have been used to monitor the dust storm area (the red square area in Figure 6, the mean AOD over this area is 0.05) and its match-up clear-sky area (the blue square area in Figure 6, the mean AOD over this area is 2.33) where the TOA radiative flux is similar to  $F_{clr}$  over duststorm area. According to this method, the influence of land surface albedo is basically eliminated, and  $F_{clr}$  over duststorm area is obtained at each pixel. We add the description on the conditions of the assumption. Please see Lines 129-133 in Page 6 of the revised manuscript.

4. Line 154 “The particle aspect ratio is set to 0.8.”: The authors need to provide references to support this setting.

**Reply:** In this study, the RTM results were used to theoretical verification of  $DRFE_{dust}$  derived from satellite observation. The dust particles are assumed to sphere (aspect ratio equal to 1) and ellipsoid (aspect ratio equal to 0.8) for dust aerosol optical properties calculating. The results shows the dust aerosol optical properties were difference in particles shape assuming, and ellipsoid (aspect ratio equal to 0.8) results is closer to those estimated by AERONET inversion aerosol optical products and the satellite observations, that is indicates most dust aerosols are non-spherical in the natural environment. There may have better assumptions of aerosol particle shapes to calculate the aerosol optical properties closer to the real values, and that need further works on observation and research. In this study, we use sphere (aspect ratio set as 1.0) and ellipsoid (aspect ratio set as 0.8) to discuss the aerosol optical properties were difference in particles shape assuming.

We have added the detailed information about the particle aspect ratio setting in the manuscript. Please see Lines 168-175 in Page 7 of the revised manuscript.

5. Line 165 “...(AERONET) inversion products”: The authors need to give more details on the inversion products.

**Reply:** It has been rewritten as “AERONET retrieves the physical properties of aerosols including volume size distribution and the complex refractive index, and optical properties including the SSA and the ASY (Dubovik and King, 2000;Dubovik et al., 2006)” are used as the input parameters for the SBDART model in simulating the  $DRFE_{dust}$ .

We have added detailed information on the inversion products. Please see Lines 187-189 in Page 8 of the revised manuscript.

6. Line 229: The authors need to give more specific information on the CERES single scanner footprint (SSF) level 2 dataset.

**Reply:** The CERES Single Scanner Footprint (SSF) Level 2 instantaneous SW Flux data available at <http://ceres.larc.nasa.gov/>. The CERES SSF is a unique product for studying the role of clouds, aerosols and radiation in climate. CERES TOA Flux from SSF product combines measurements with scene information from MODIS Aqua (in our study). This data corresponds to the footprints that are co-located in latitude and longitude with reference to the MODIS scene.

The radiative fluxes at TOA are derived from the CERES radiance measurements in three broad-band channel, using empirical Angular Distribution Models (ADMs). The ADMs are a function of varying scene types, such as land, ocean, cloud cover, aerosols, etc. Research shows that the uncertainty of TOA instantaneous shortwave flux is about 1.6% ( $4.5Wm^{-2}$ ) over clear-sky land, and about 2.7% ( $8.4Wm^{-2}$ ) over land under all-sky conditions (Su et al., 2015). Thus, TOA radiative fluxes derived from the CERES measuring radiance are reliable which could be used to estimate the  $DRE_{dust}$  and the  $DRFE_{dust}$  at the TOA. The  $DRE_{dust}$  and the  $DRFE_{dust}$  at the TOA are estimated by synergistically using MODIS and CERES products.

We have added the detailed information about the CERES SSF L2 dataset in the manuscript. Please see Lines 269-273 in Page 12 of the revised manuscript.

7. Lines 254-255 “The TOA SW radiative flux distribution shows the highest value over cloud conditions.”: From Figure 6, this description is not always true. For example, the bottom right corner in Figure 6f.

**Reply:** Thank you for carefully reviewing our manuscript, it is ture that the TOA SW radiative flux not

have extremely high value in the bottom right corner in Figure 6f. That might be because not all of the pixels are covered by cloud in the bottom right corner in Figure 6f, some of pixels are in clear-sky conditions (not covered by clouds). Thus, it is reasonable that the mixed pixel not have extremely high value of TOA SW radiative flux as cloudy pixels, and the mixed pixel also have higher TOA SW radiative flux values than dusty and clear-sky pixels. Therefore, we consider the description of “The TOA SW radiative flux distribution shows the highest value over cloud conditions.” is true for Fig.6.

8. Line 256: Please explain “the SW albedo of the aerosols in the cloud”.

**Reply:** Thank you for helping us to check out the mistake. It has been rewritten as “It is due to the SW albedo of the dust aerosols and cloud are higher than land surface albedo.”. Please see Line 292-293 in Page 13 of the revised manuscript.

9. Line 281 “According to the definition, the  $DRFE_{dust}$  represents the  $DRE_{dust}$  of a certain AOD at per unit area”: It is not consistent with the previous definition in section 2.

**Reply:** The  $DRFE_{dust}$  represents the  $DRE_{dust}$  of per unit aerosol optical depth (AOD), which means the efficiency of the dust aerosol that affects the net radiative flux of solar radiation. We have revised this sentence in the manuscript. It has been rewritten as “According to the definition, the  $DRFE_{dust}$  represents the  $DRE_{dust}$  of per unit AOD during these storms in the dust source regions.”. Please see Lines 329-330 in Page 16 of the revised manuscript.

10. Line 326 “However, the contents of the SW radiative flux change little...”: Please explain “the contents of the SW radiative flux”.

**Reply:** It has been rewritten as “the values of the SW radiative flux changed little while the height of dust layer increased”. Please see Lines 373-374 in Page 19 of the revised manuscript.

11. Subsection “4.1 Dust microphysical properties”: The authors need to give more details on the retrievals of these dust microphysical properties in this subsection.

**Reply:** The inversion of sun-photometry optical data to obtain particle microphysical properties has been done through numerous approaches. Currently, the AERONET inversion algorithm makes use of direct sun and sky radiance measurements (Dubovik et al., 2006; Dubovik and King, 2000).

We have added details on the retrievals of these dust microphysical properties in Section 4.1. Please see Lines 397-399 in Page 21 of the revised manuscript.

12. Line 360: Please provide the definition of moderate aerosol particle.

**Reply:** This sentence means coarse mode dust aerosol particles increase under dusty conditions. Sorry for the ambiguity sentence. We have removed the ambiguity sentence from the manuscript. Please see Lines 416-421 in Page 22 of the revised manuscript.

13. Line 365: I am surprised at the result of the peak radius (1.71  $\mu\text{m}$ ) of dust particles at Tamanrasset station. The authors need to double-check it and compare with the results from other literature.

**Reply:** Following the suggestion, we double-checked the aerosol size distribution in the Sahara Desert during dust storms. The results shows the aerosol size distribution peaks at the radius of 1.71  $\mu\text{m}$  in Tamanrasset during dust storms occurred on March 9 and 11, 2019.

We also survey previous study on the aerosol size distribution in the Sahara Desert. The works of



Guirado et al. (2014) (Guirado et al., 2014) shows the aerosol particle effective radius mainly around  $1.7\mu\text{m}$  in Tamanrasset.

**Table 5.** Monthly means of volume particle concentration (VolCon) of total, fine and coarse modes, fine mode volume fraction ( $V_f/V_t$ ), and effective radius ( $R_{\text{eff}}$ ) for the period October 2006–February 2009 at Tamanrasset<sup>a</sup>.

| Month     | VolCon ( $\mu\text{m}^3 \mu\text{m}^{-2}$ ) |                  |                | $V_f/V_t^b$    | $R_{\text{eff}}$ ( $\mu\text{m}$ ) |                  |                | No. of days |
|-----------|---------------------------------------------|------------------|----------------|----------------|------------------------------------|------------------|----------------|-------------|
|           | Total                                       | Fine             | Coarse         |                | Total                              | Fine             | Coarse         |             |
| January   | 0.04<br>(0.09)                              | 0.005<br>(0.003) | 0.04<br>(0.08) | 0.21<br>(0.09) | 0.63<br>(0.22)                     | 0.163<br>(0.023) | 1.92<br>(0.38) | 38          |
| February  | 0.06<br>(0.09)                              | 0.008<br>(0.008) | 0.05<br>(0.09) | 0.17<br>(0.09) | 0.70<br>(0.20)                     | 0.151<br>(0.026) | 1.89<br>(0.21) | 27          |
| March     | 0.17<br>(0.18)                              | 0.015<br>(0.016) | 0.15<br>(0.17) | 0.11<br>(0.05) | 0.78<br>(0.16)                     | 0.141<br>(0.025) | 1.86<br>(0.32) | 22          |
| April     | 0.16<br>(0.22)                              | 0.014<br>(0.012) | 0.14<br>(0.20) | 0.11<br>(0.04) | 0.77<br>(0.11)                     | 0.145<br>(0.020) | 1.66<br>(0.14) | 21          |
| May       | 0.23<br>(0.18)                              | 0.017<br>(0.011) | 0.21<br>(0.17) | 0.09<br>(0.02) | 0.86<br>(0.11)                     | 0.133<br>(0.012) | 1.72<br>(0.09) | 24          |
| June      | 0.25<br>(0.22)                              | 0.019<br>(0.008) | 0.23<br>(0.22) | 0.10<br>(0.04) | 0.80<br>(0.19)                     | 0.129<br>(0.016) | 1.68<br>(0.13) | 35          |
| July      | 0.27<br>(0.31)                              | 0.025<br>(0.014) | 0.25<br>(0.30) | 0.13<br>(0.06) | 0.69<br>(0.22)                     | 0.122<br>(0.014) | 1.72<br>(0.11) | 35          |
| August    | 0.19<br>(0.16)                              | 0.022<br>(0.011) | 0.17<br>(0.15) | 0.16<br>(0.08) | 0.61<br>(0.17)                     | 0.123<br>(0.018) | 1.72<br>(0.14) | 45          |
| September | 0.20<br>(0.11)                              | 0.018<br>(0.009) | 0.18<br>(0.10) | 0.10<br>(0.02) | 0.79<br>(0.11)                     | 0.139<br>(0.019) | 1.62<br>(0.09) | 23          |
| October   | 0.12<br>(0.10)                              | 0.014<br>(0.009) | 0.11<br>(0.10) | 0.13<br>(0.04) | 0.71<br>(0.11)                     | 0.143<br>(0.019) | 1.62<br>(0.14) | 45          |
| November  | 0.05<br>(0.03)                              | 0.008<br>(0.005) | 0.04<br>(0.03) | 0.19<br>(0.07) | 0.58<br>(0.13)                     | 0.146<br>(0.024) | 1.77<br>(0.27) | 54          |
| December  | 0.04<br>(0.03)                              | 0.007<br>(0.004) | 0.03<br>(0.02) | 0.22<br>(0.09) | 0.59<br>(0.18)                     | 0.159<br>(0.030) | 1.82<br>(0.25) | 38          |

<sup>a</sup>Corresponding standard deviations are shown in brackets.

<sup>b</sup>Dimensionless.

14. Line 392-393 “The higher value of SSA shows that dust aerosol particles scatter more predominantly and strongly in the Taklimakan desert (Kashi)...”: That cannot be clearly obtained from Figure 14.

**Reply:** We re-drewed the image.

(a) Single Scattering Albedo of dust aerosols over Sahara Desert

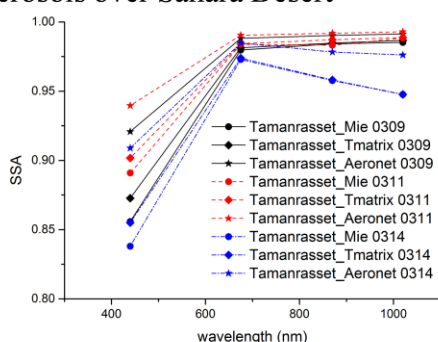

(b) Single Scattering Albedo of dust aerosols over Taklimakan Desert

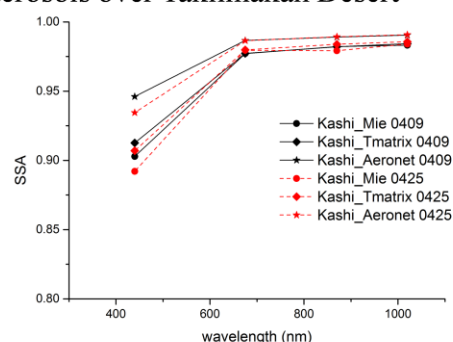

**Figure 9:** Single scattering albedo from (a) the Sahara Desert and (b) the Taklimakan Desert.

Figure 9 shows the variabilities of the dust aerosol SSA between different dust source regions and different calculation methods. The SSA of dust aerosol in Taklimakan desert are higher than dust aerosol in Sahara desert in most dust storms. Please see Fig.13 in Page 23 of the revised manuscript.

15. Lines 399-403 “The ASY value increases with the particle size”, “It can be found that the dust

aerosols from the Sahara Desert (Tamanrasset) have higher values of the ASY than those from the Taklimakan desert (Kashi) ...”: They seem to contradict with the previous results those the peak radius of dust particles at Tamanrasset (1.71  $\mu\text{m}$ ) is smaller than that at Kashi (2.24  $\mu\text{m}$ ).

**Reply:** It is true that larger dust particles usually have higher values of ASY. However, the ASY here is the mean ASY of all the dust particles during dust storms, not the ASY of dust particles in peak radius. Therefore, it is reasonable that the mean ASY of dust aerosols in Tamanrasset is higher than the dust aerosols in Kashi, although the peak radius of dust particles at Tamanrasset (1.71  $\mu\text{m}$ ) is smaller than that at Kashi (2.24  $\mu\text{m}$ ).

Moreover, the ASY derived from AERONET (the pentagrams in Fig. 14 of the revised manuscript) also shows the mean ASY of dust aerosols in Tamanrasset is higher than the dust aerosols in Kashi. This proves the ASY calculated by Mie and T-matrix methods are reliable, and it is reasonable that the mean ASY of dust aerosols in Tamanrasset is higher than the dust aerosols in Kashi during the dust storms.

16. Lines 403-404 “The high values (over 0.80 at 440 nm) reflect the dominance of the absorbing of dust aerosols”: The authors need to give an explanation.

**Reply:** Sorry for the ambiguity sentence. We have removed this sentence from the manuscript. Please see Lines 449-450 in Page 23 of the revised manuscript.

17. Lines 404-406 “The stronger backward scattered energy may cause higher negative radiative forcing in the Taklimakan Desert (Kashi)”: It is not always true at TOA, in the atmosphere, or at BOA.

**Reply:** In this study we evaluate the  $\text{DRFE}_{\text{dust}}$  at TOA both using satellite observations and RTM simulations. The stronger backward scattered energy may cause higher negative radiative forcing at TOA. Therefore, it been rewritten as “The stronger backward scattered energy may cause higher negative radiative forcing in the Taklimakan Desert (Kashi) at the TOA.”.

Please see Line 457 in Page 24 of the revised manuscript.

18. Lines 416, 475: I cannot find the results of backward scattering coefficients.

**Reply:** Sorry for the ambiguity sentence. It has been rewritten as “As shown in Fig. 15, with higher aerosol scattering (higher SSA in Fig. 13) and higher backward scattering (lower ASY in Fig. 14), the negative  $\text{DRFE}_{\text{dust}}$  from Kashi is more significant.”. Please see Line 467 in Page 25 of the revised manuscript.

19. Lines 417-419: The mean  $\text{DRFE}_{\text{dust}}$  results obviously disagree with those in Figure 8. How did the authors draw a conclusion that “The results are in good agreement with those estimated by the satellite observations”?

**Reply:**

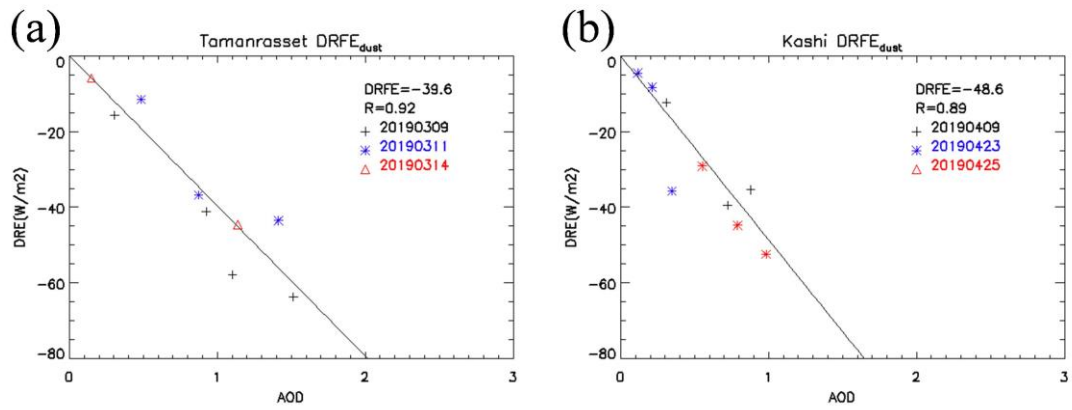

**Figure 10: DRE<sub>dust</sub> derived from satellite observations in (a) March 2019 over Tamanrasset and (b) April 2019 over Kashi.**

In Fig. 10, the mean DRFE<sub>dust</sub> of the dust storms is  $-39.6 \text{ Wm}^{-2}\tau^{-1}$  over Tamanrasset and  $-48.6 \text{ Wm}^{-2}\tau^{-1}$  over Kashi.

(a) DRFE<sub>dust</sub> of Sahara Desert

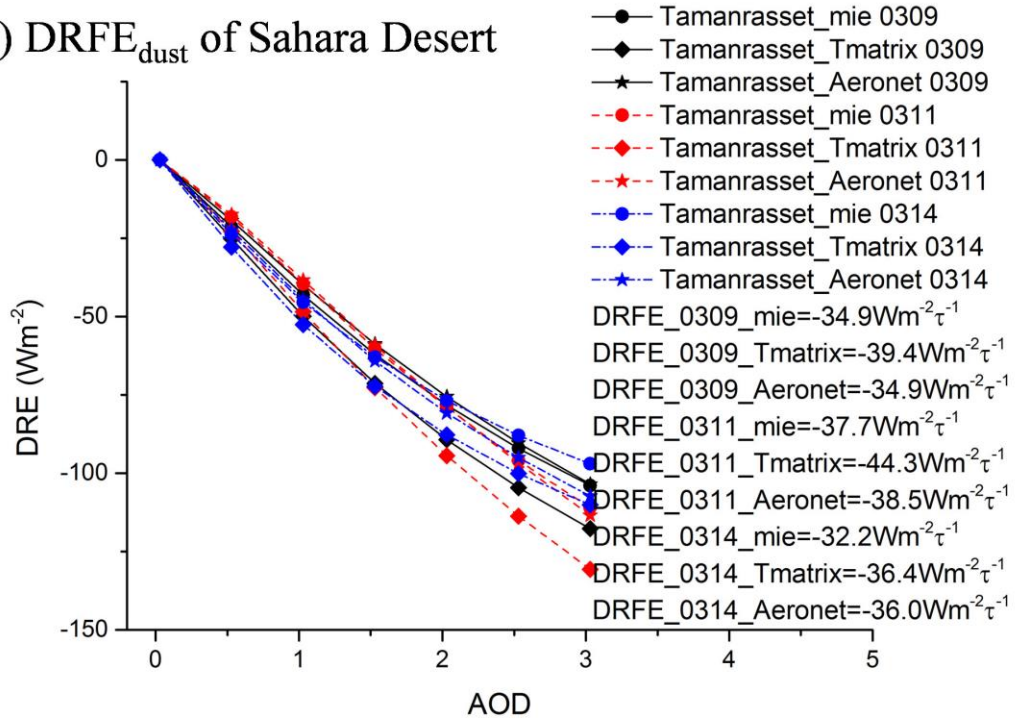

(b) DRFE<sub>dust</sub> of Taklimakan Desert

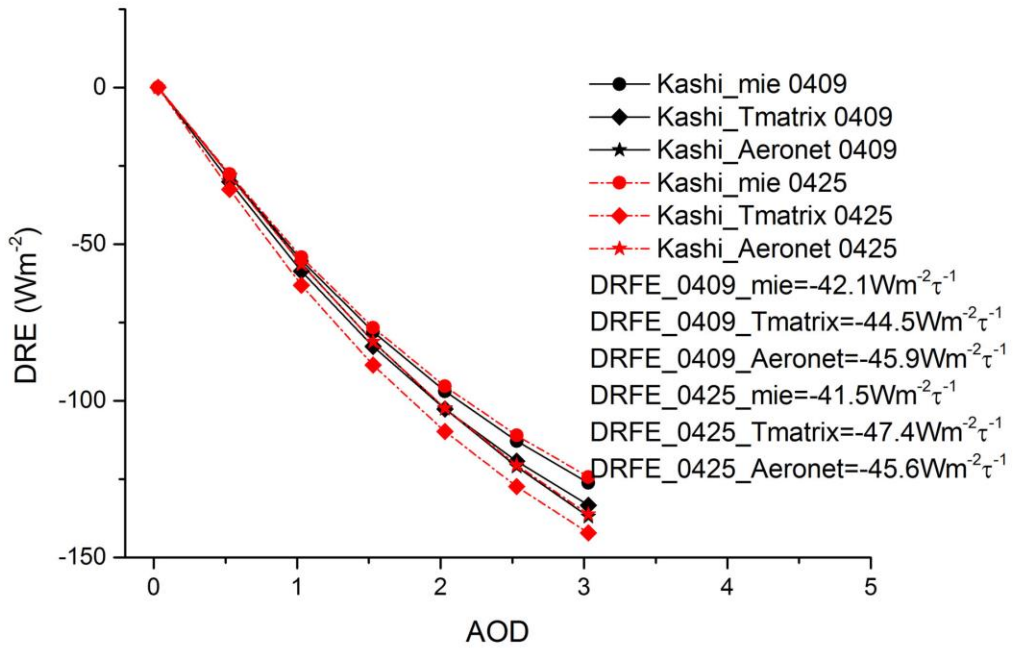

Figure 11: DRFE<sub>dust</sub> simulated by the SBDART in (a) Tamanrasset and (b) Kashi.

The DRFE<sub>dust</sub> estimated directly by the satellite observation is compared with that simulated by the SBDART to verify the reliability. As shown in Fig. 11, the negative DRFE<sub>dust</sub> from Kashi is more significant. The mean DRFE<sub>dust</sub> in Kashi is  $-44.5 \text{ Wm}^{-2} \tau^{-1}$ , and mean DRFE<sub>dust</sub> in Tamanrasset is  $-37.1 \text{ Wm}^{-2} \tau^{-1}$ . The results are in good agreement with those estimated by the satellite observations.



20. Lines 424, 427-428: The authors need to give more details on the calculation of 9.0%, 7.6% and 6.8%.

**Reply:** Thank you for helping us to check out the mistake. The mean difference of the  $DRFE_{dust}$  between Tamanrasset and Kashi ( $7.4 \text{ W m}^{-2} \tau^{-1}$ , 18.14%) is derived from difference between the mean  $DRFE_{dust}$  in Tamanrasset ( $-37.1 \text{ W m}^{-2} \tau^{-1}$ ) and in Kashi ( $-44.5 \text{ W m}^{-2} \tau^{-1}$ ); the mean standard deviations of the  $DRFE_{dust}$  estimated using different method in Tamanrasset ( $2.8 \text{ W m}^{-2} \tau^{-1}$ , 7.6%) and in Kashi ( $3.0 \text{ W m}^{-2} \tau^{-1}$ , 6.8%) are derived from the mean standard deviations of the  $DRFE_{dust}$  results which using same dust aerosol properties and in different methods. We have added the calculation details and corrected the mistake in the revised manuscript. Please see Line 470-475 in Page 26 of the revised manuscript.

21. Lines 425-426 “Even for the same dust microphysical property, the  $DRFE_{dust}$  varies significantly according to whether the dust particles are considered spherical or non-spherical in different methods”: Particle shape or morphology is microphysical property.

**Reply:** Thank you for your reminding. It has been rewritten as “Even for the same size distributions and the complex refractive index of dust aerosol, the  $DRFE_{dust}$  varies significantly according to whether the dust particles are considered spherical or non-spherical in different methods”. Please see Lines 476-478 in Page 26 of the revised manuscript.

22. Table 1: Please double-check the data in this table. The ranges “-32.2~-44.3” and “-41.5~-47.4” were obtained due to the SBDART radiative transfer calculation methodology employing different Mie or T-matrix models. The differences cannot be considered as the ranges of  $DRFE_{dust}$  variation.

**Reply:** Dust storms occurred on March 9, 11 and 14, 2019 in Sahara Desert, and dust storms occurred on April 9, 23 and 25, 2019 in Taklimakan Desert are chosen as case studies to estimated the  $DRFE_{dust}$ . Therefore, the  $DRFE_{dust}$  variation not only derived from calculation methodology, but also from the dust microphysical property difference in dust storms.

23. Lines 462-463 “The compared results show that the  $DRFE_{dust}$  derived from the satellite-based equi-albedo method is closer to that in previous studies with lower uncertainty”: I cannot find the evidences that the proposed satellite-based equi-albedo method with lower uncertainty.

**Reply:** The  $DRFE_{dust}$  estimated by the satellite-based equi-albedo method is obtained without the dust microphysical properties being assumed, it should have lower uncertainty. The uncertainties of  $DRFE_{dust}$  estimated by the satellite-based equi-albedo method are mostly caused by observation errors, and it is hard to estimate the  $DRFE_{dust}$  results derived from model simulations. To avoid the ambiguity, we rewrite the sentence as “The compared results show that the  $DRFE_{dust}$  derived from the satellite-based equi-albedo method is closer to that in previous studies”. Please see Lines 510-511 in Page 27 of the revised manuscript.

24. Line 466 “Therefore, the uncertainties can be evaluated more reasonably.”: Please explain and certify “more reasonably”.

**Reply:** The SBDART simulation results shows the dust microphysical properties can significantly influence the  $DRFE_{dust}$ , and the  $DRFE_{dust}$  varies significantly according to whether the dust particles are considered spherical or non-spherical in different methods. It can cause significant errors in evaluating the modulating effects of the mineral dust aerosols on climate, and the uncertainty is hard to estimated

(Li et al., 2020;Huang et al., 2009). Instead that, the  $DRFE_{dust}$  estimated by the satellite-based equi-albedo method is obtained without the dust microphysical properties being assumed. The uncertainties are mostly caused by observation errors.

The uncertainties of the  $DRFE_{dust}$  derived from the equi-albedo method include the instantaneous SW flux error from CERES measurements, the estimation uncertainties of the  $F_{clr}$  over the dust storm region, and the uncertainty in the deep blue AOD product. And we consider the uncertainties of the  $DRFE_{dust}$  estimated in this paper are reasonable.

## Some technical comments:

The authors need to read through the manuscript carefully and correct the grammatical errors. I just picked a few of them:

**Reply:** Nanjing Hurricane Translation have review the English language quality of the manuscript.

1. Lines 58-60: The large spatial variability of aerosols and the lack of an adequate database on their properties makes  $DRE_{dust}$  and  $DRFE_{dust}$  much difficult to estimated (Satheesh and Srinivasan, 2006).

**Reply:** It has been rewritten as “The large spatial variability of aerosols and the lack of an adequate database on their properties make  $DRE_{dust}$  and  $DRFE_{dust}$  very difficult to be estimated (Satheesh and Srinivasan, 2006).”. Please see Lines 58-60 in Page 2-3 of the revised manuscript.

2. Lines 78-80: Thus, the assessment of the SW  $DRFE_{dust}$  and microphysical properties of the dust over these regions is important for evaluating regional and global climate changes.

**Reply:** It has been rewritten as “Thus, the assessment on the SW  $DRFE_{dust}$  and dust microphysical properties over the Sahara Desert and the Taklimakan Desert is meaningful to evaluate regional and global climate changes.”. Please see Lines 88-90 in Page 3-4 of the revised manuscript.

3. Lines 156-157: Santa Barbara Disort Atmospheric Radiative Transfer (SBDART) is an RTM that calculates the plane-parallel radiative transfer of the earth-atmosphere system (Ricchiazzi et al., 1998).

**Reply:** It has been rewritten as “Santa Barbara DISORT Atmospheric Radiative Transfer (SBDART) is an RTM that calculates the plane-parallel radiative transfer of the earth-atmosphere system (Ricchiazzi et al., 1998).”. Please see Lines 177-178 in Page 7 of the revised manuscript.

4. Lines 272-273: To avoid the influence of the LSA and SZA in estimating the  $DRFE_{dust}$ , pixels with LSA of 0.16–0.20 and SZA of 32–38 degrees are chosen to derive the  $DRFE_{dust}$ .

**Reply:** It has been rewritten as “To avoid the influence of the LSA and SZA in estimating the  $DRFE_{dust}$ , we estimate  $DRFE_{dust}$  using pixels with similar LSAs and SZAs. Furthermore, the values of AOD and cloud could also influence the regions we selected. The deep blue algorithm retrieved AOD has large uncertainties in the small value areas. The cloud-free pixels with AOD great than 0.1, and with the LSA of 0.16–0.20 and the SZA of 32–38 degrees are chosen to estimate the  $DRFE_{dust}$ .”. Please see Lines 317-322 in Page 15 of the revised manuscript.

5. Line 324: The sensitivity test of SW radiative flux at the TOA to changes height of dust layer.

**Reply:** It has been rewritten as “The sensitivity test of SW radiative flux at the TOA to various heights of dust layer.”. Please see Line 377 in Page 20 of the revised manuscript.

6. Lines 325-326: As Fig.11 shown, the SW radiative flux at the TOA was decreased with the height of dust layer was increased from 0km to 18km.

**Reply:** It has been rewritten as “As shown in Fig. 10, the SW radiative flux at the TOA decreases with the increase of the height of dust layer. ”. Please see Lines 378-379 in Page 20 of the revised manuscript.

7. Lines 326-327: However, the contents of the SW radiative flux change little with the height of dust layer increased (within  $1.5\text{Wm}^{-2}$ , 0.47%), which is little than CERES observation errors.

**Reply:** It has been rewritten as “However, the contents of the SW radiative flux change little with the increase of the height of dust layer (within  $1.5\text{Wm}^{-2}$ , 0.47%).”. Please see Lines 379-380 in Page 20 of the revised manuscript.

Some figures in the manuscript were hard to read:

8. Figure 2: The longitude and latitude are not shown in the figure. The regions of the two red boxes do not seem to correspond exactly to the images of MODIS Aqua.

**Reply:** Thanks for the suggestion. We have added the longitude and latitude axis and re-drewed the red boxes to correspond to the images of MODIS Aqua in the figure.

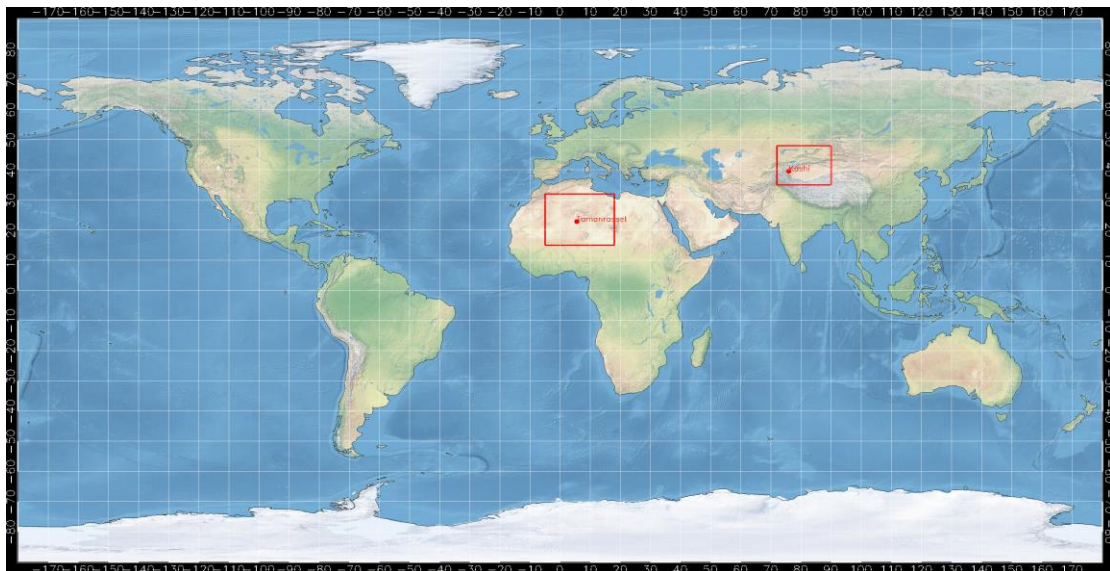

**Figure 12: The research regions and dust storms viewed by MODIS AQUA on 11 March and 9 April 2019.**

Please see Fig.2 in Page 9 of the revised manuscript.

9. Figures 3,5-10,12-15: Axis labels and legends are very small in these figures.

**Reply:** Thanks for the suggestion. We have re-drewed these figures and increased the character size of axis labels and legends in these figures.

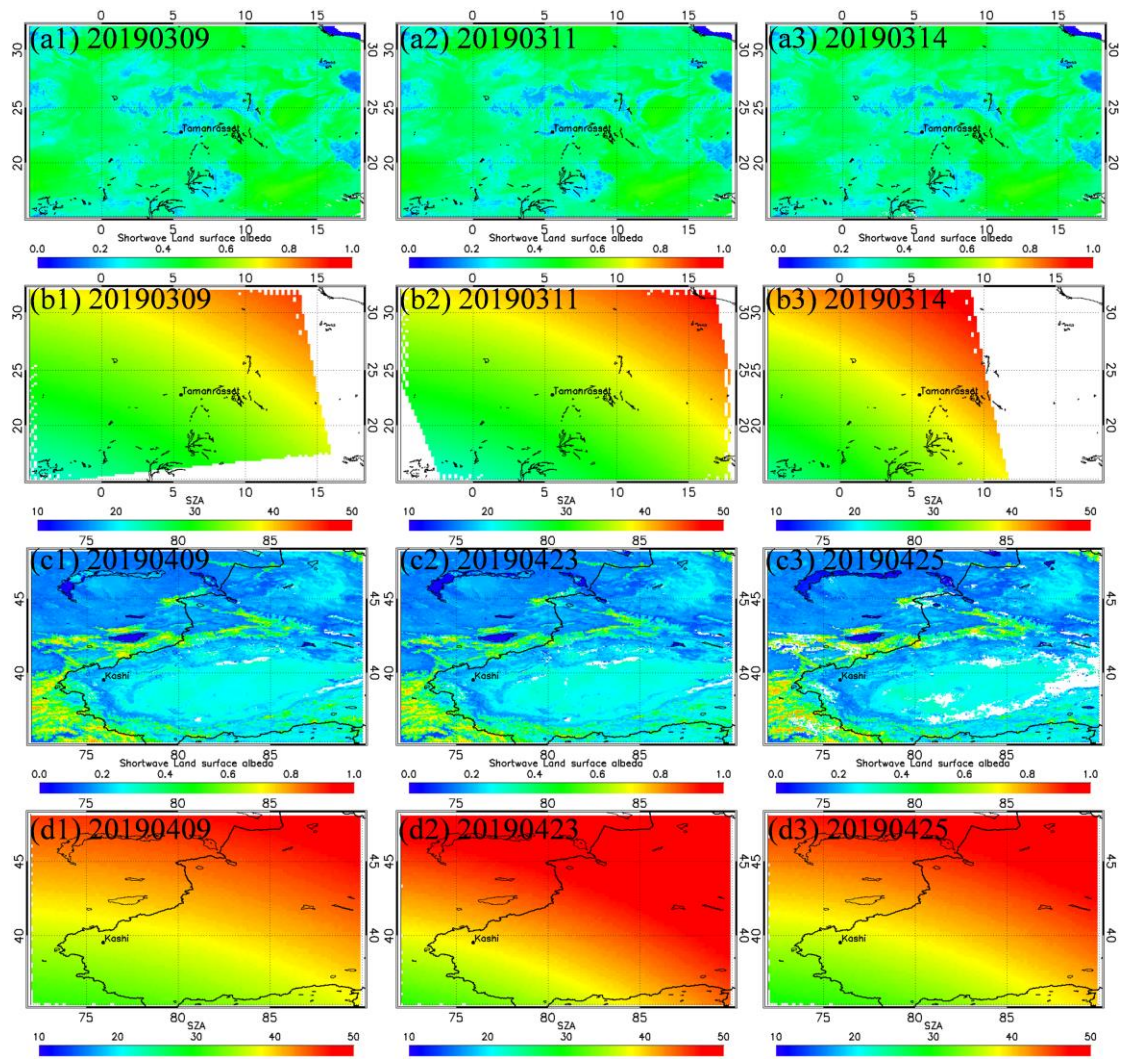

Figure 13: SW LSA and SZA over Sahara desert and Taklimakan desert derived from AQUA/MODIS.



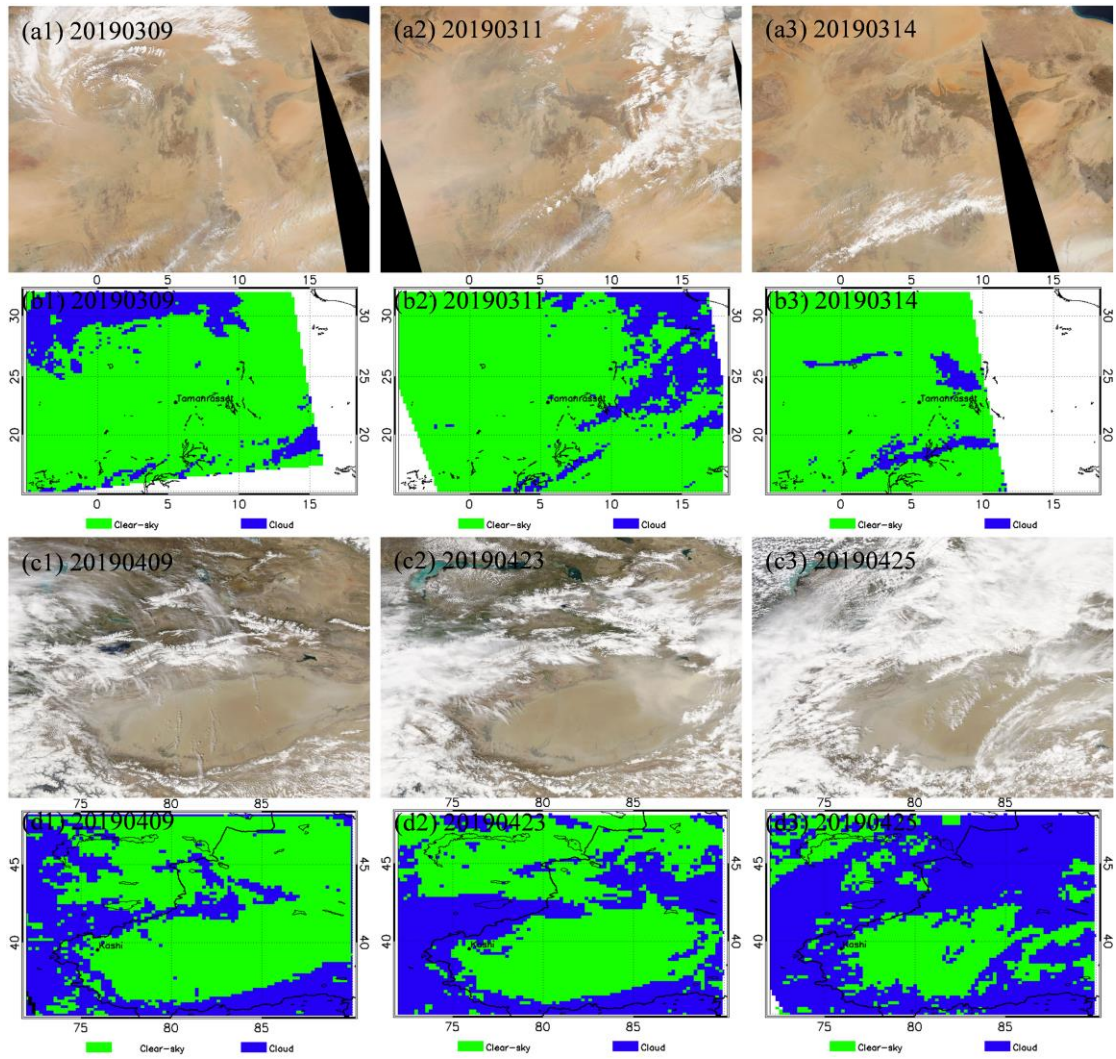

Figure 14: True color images and cloud detections from AQUA/MODIS observations.

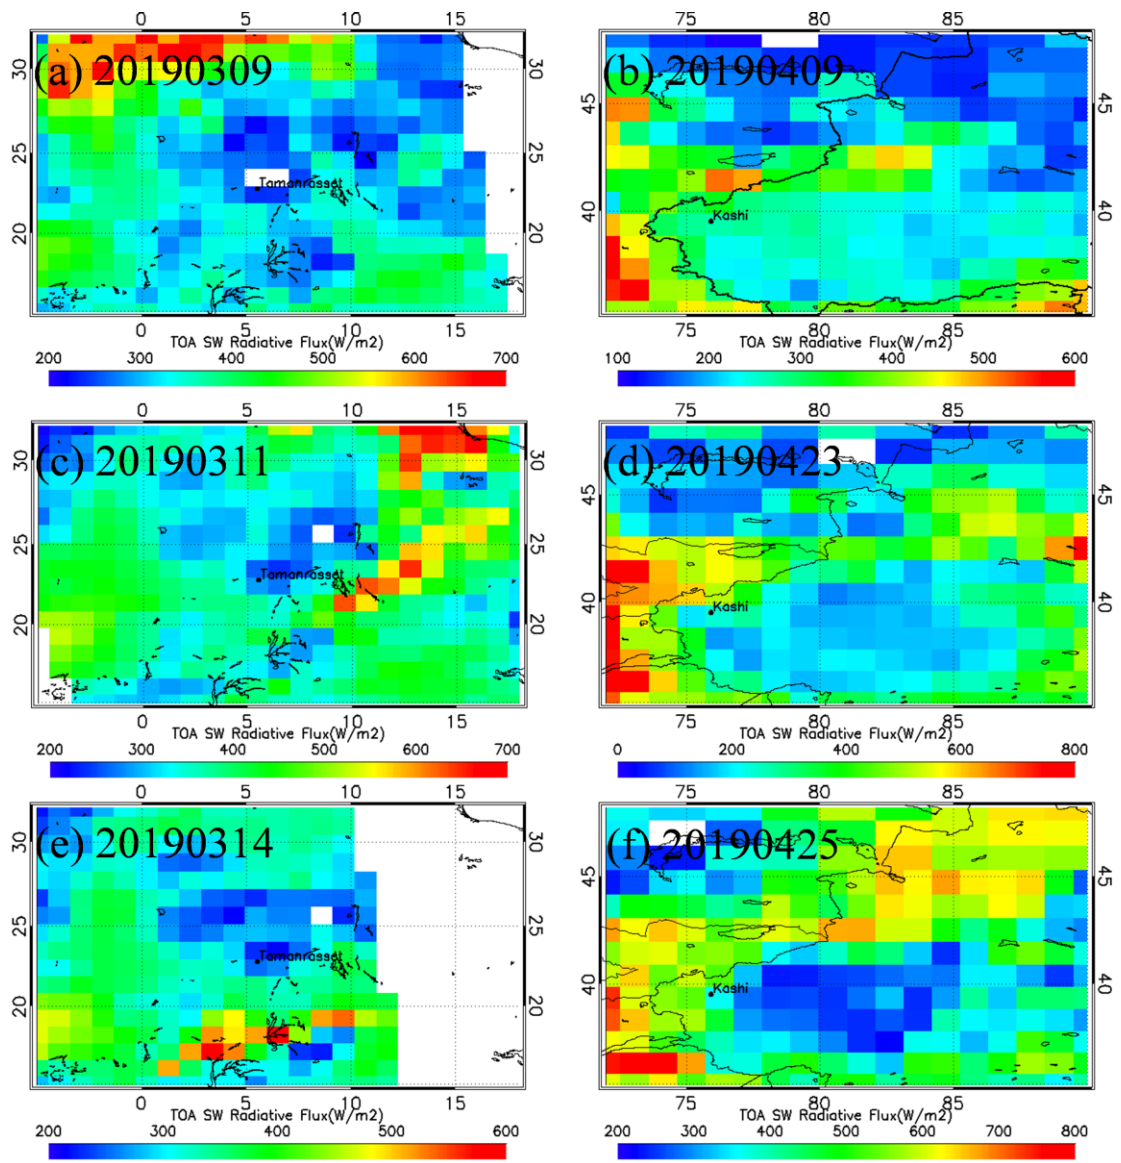

Figure 15: TOA SW radiative flux derived from AQUA/CERES on March 2019 over Sahara desert and on April 2019 over Taklimakan desert.

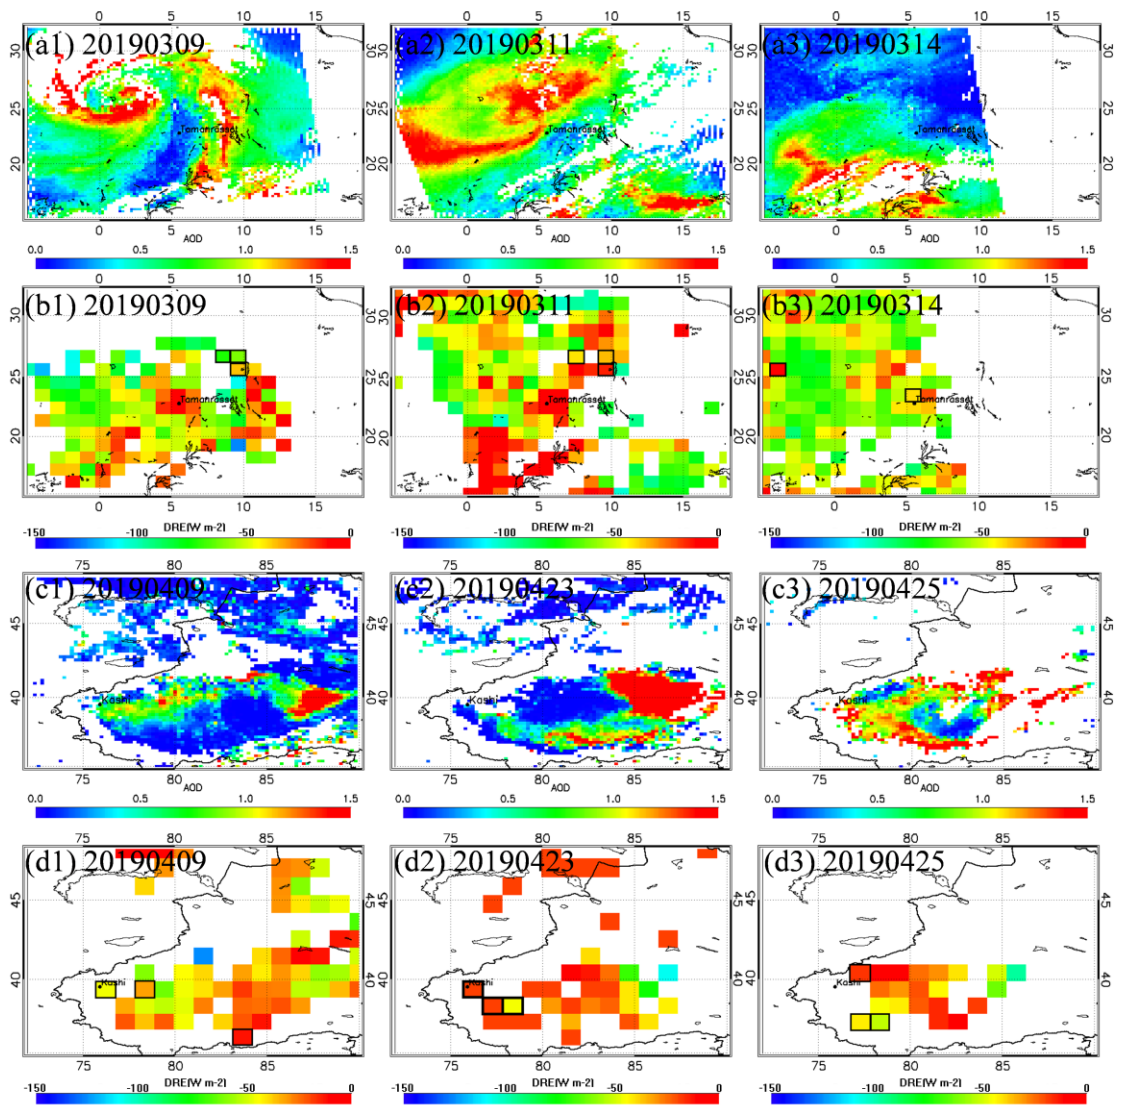

Figure 16: AOD and DRE dust of dust storms on March 2019 over Sahara desert and on April 2019 over Taklimakan desert.

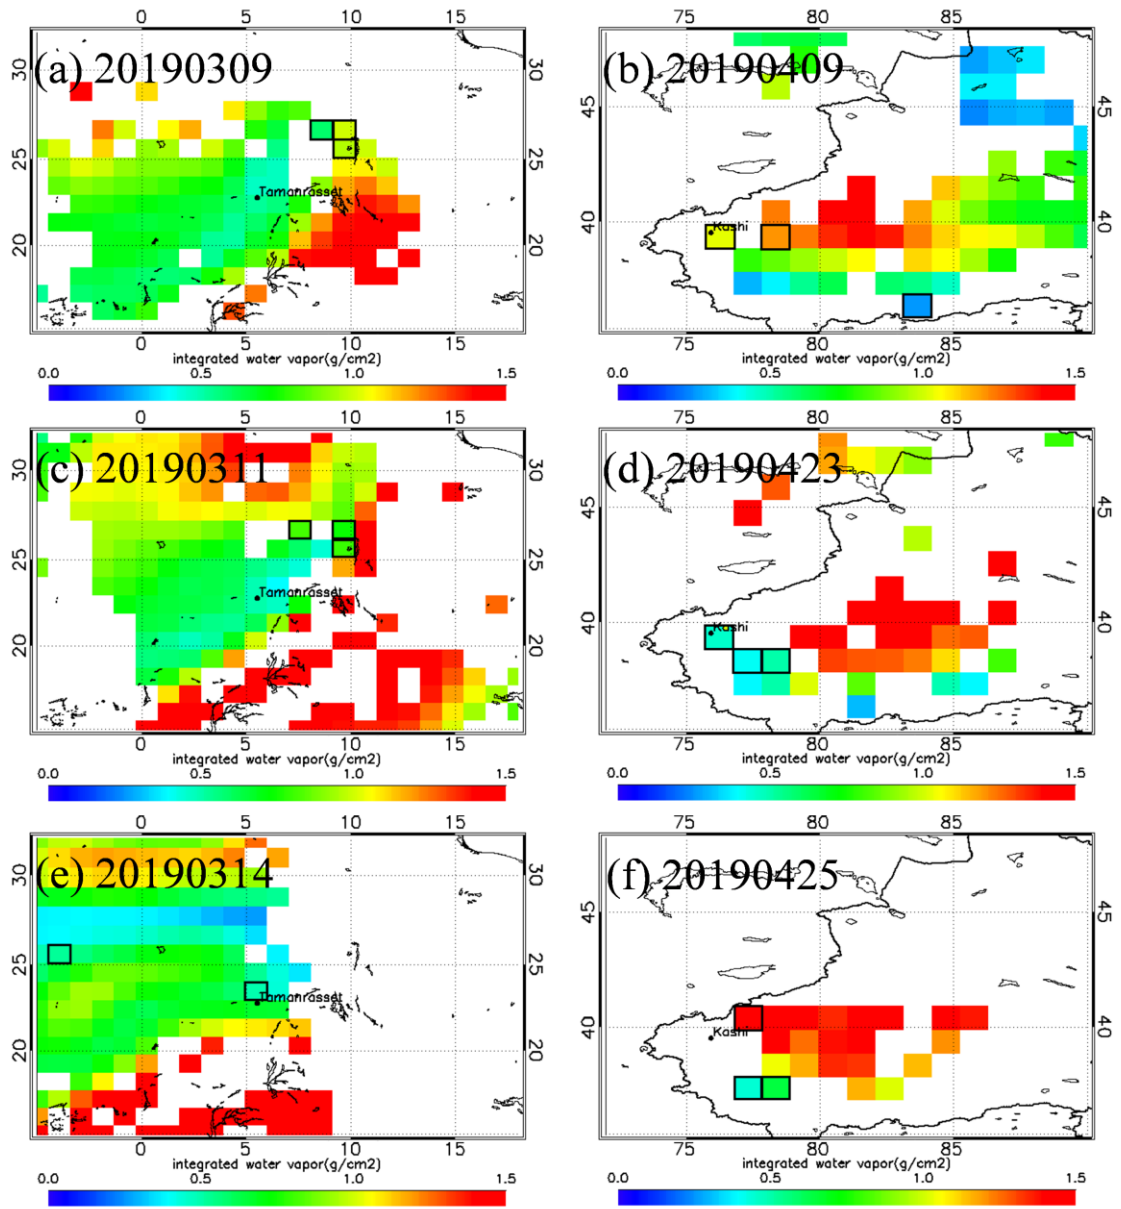

Figure 17: Integrated water vapor ( $\text{g/cm}^2$ ) from European Centre for Medium-range Weather Forecasts (ECMWF) reanalysis dataset over the Sahara Desert in March 2019 and over the Taklimakan Desert in April 2019.



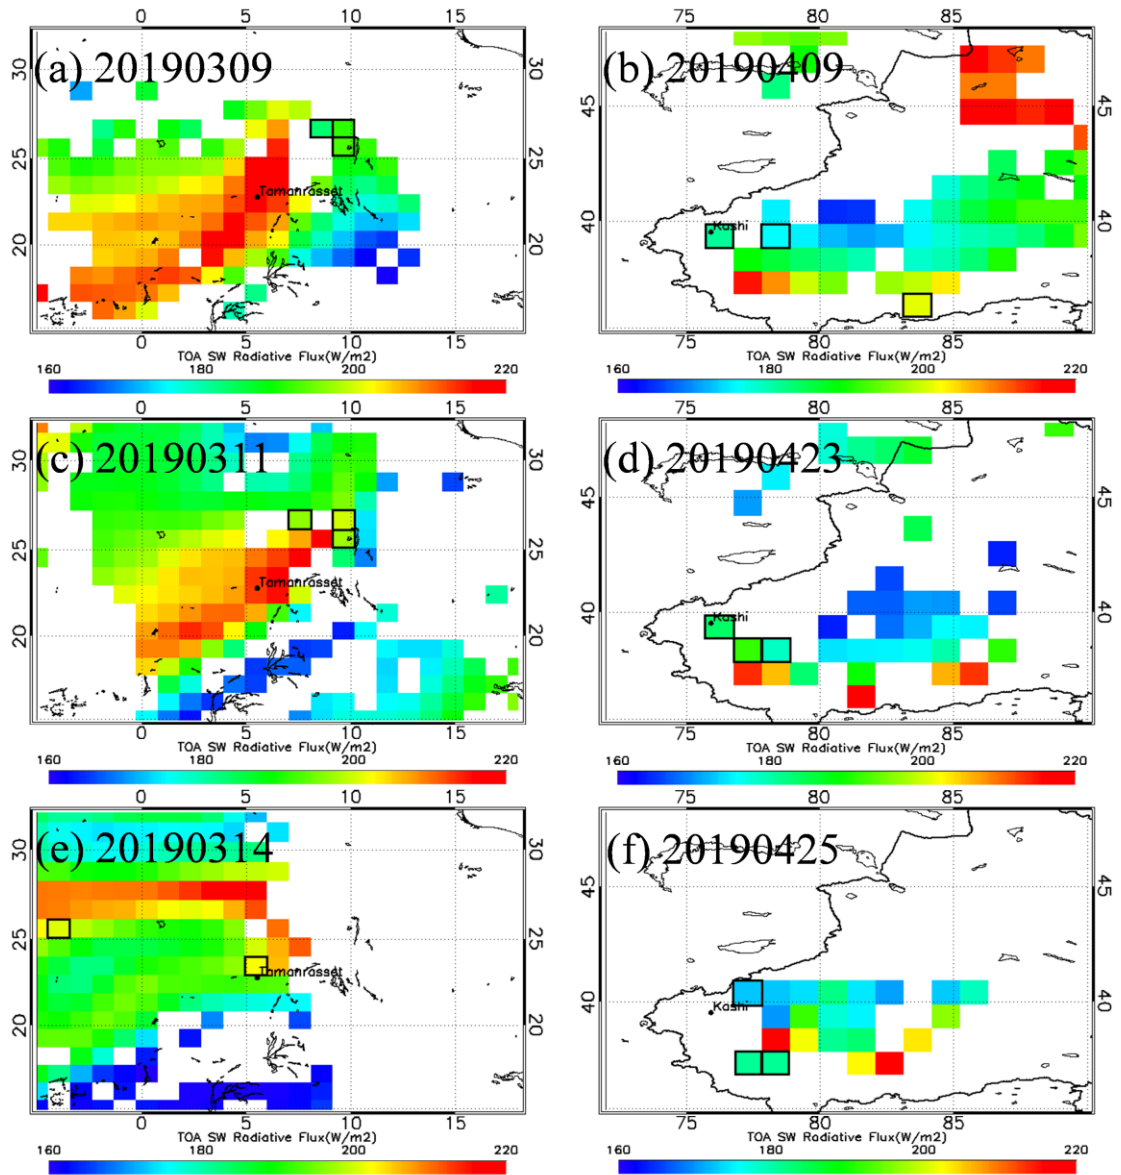

Figure 18: SBDART simulated clear-sky TOA radiative flux by using integrated water vapor ( $\text{g}/\text{cm}^2$ ) from ECMWF reanalysis dataset over the Sahara Desert in March 2019 and over the Taklimakan Desert in April 2019.

Please see Fig.3-6 in Page 10-14, Fig.8 in Page 18 and Fig.9 in Page 19 of the revised manuscript.

10. Figure 8: The units of  $\text{DRFE}_{\text{dust}}$  should be added.

**Reply:** Thanks for the suggestion. We have re-drawn the image and added the units of  $\text{DRFE}_{\text{dust}}$ .

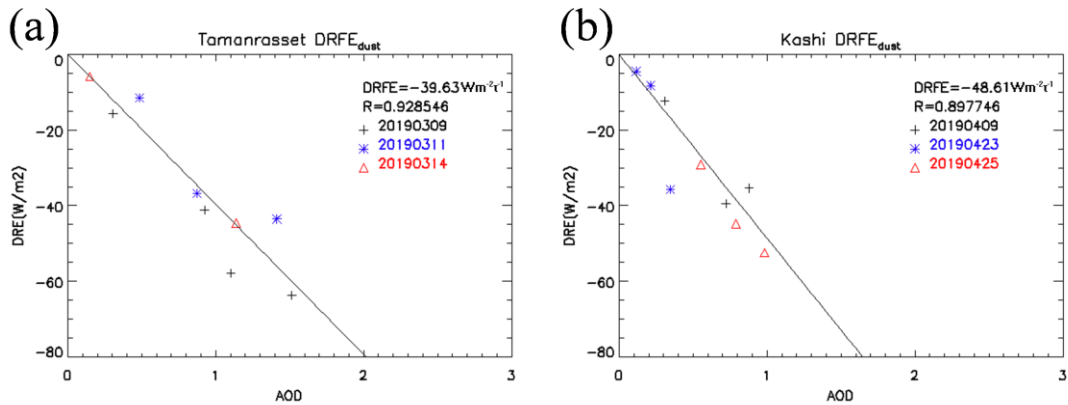

Figure 19: DREdust in (a) March 2019 over Tamanrasset and (b) April 2019 over Kashi.

Please see Fig.7 in Page 16 of the revised manuscript.

11. Figures 14-16: It is recommended to use “Mie” (starting with capital letter) instead of “mie” in these figures.

**Reply:** Thanks for the suggestion. We have re-drawn these Figures and using “Mie” instead of “mie” in these figures.

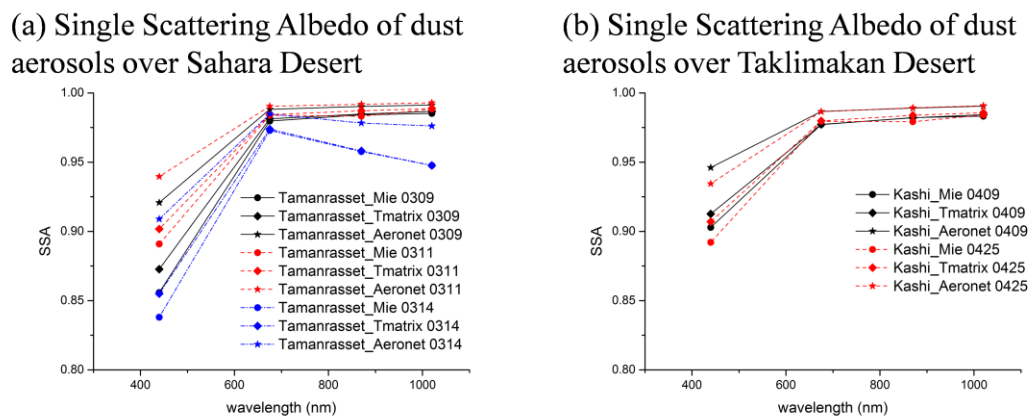

Figure 20: Single scattering albedo from (a) the Sahara Desert and (b) the Taklimakan Desert.

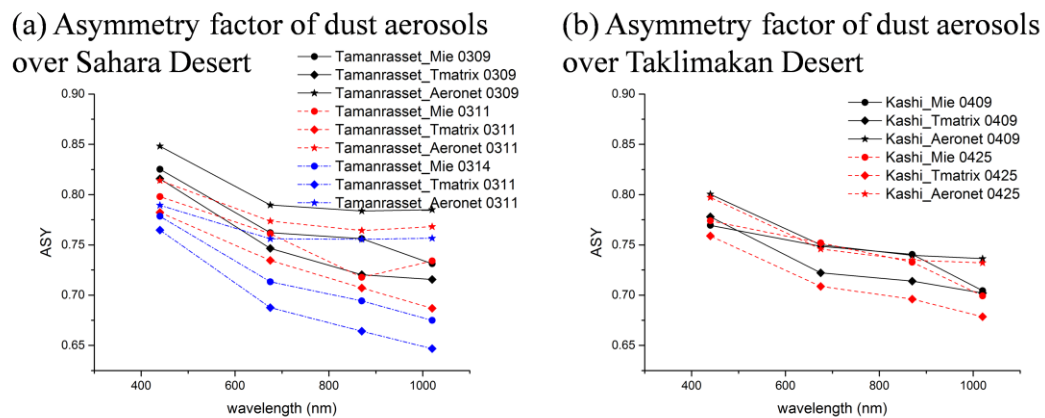

Figure 21: Asymmetry factor in (a) the Sahara Desert and (b) the Taklimakan Desert.

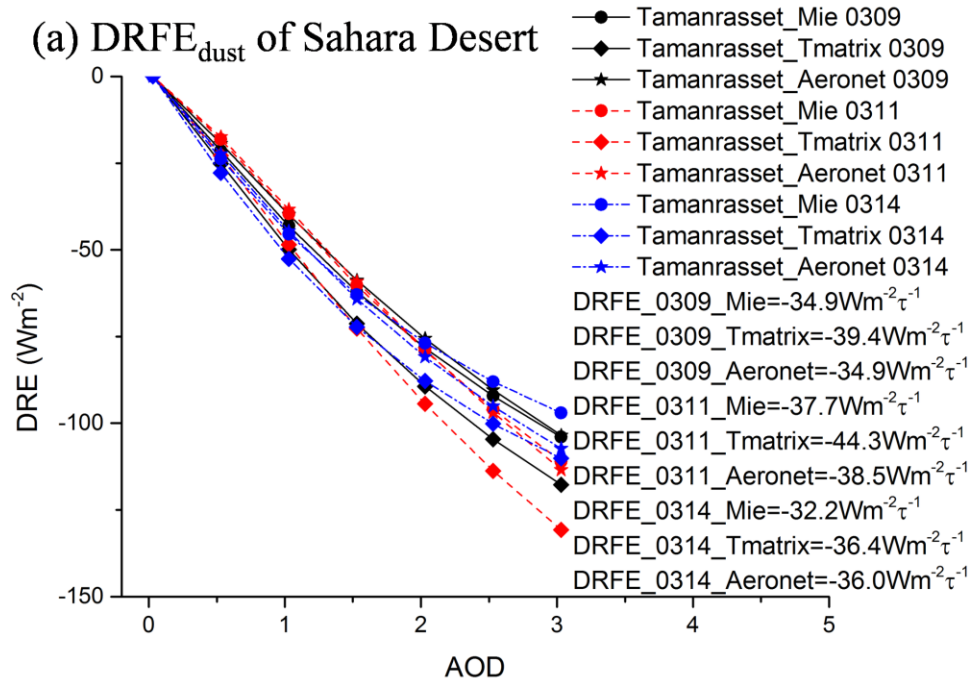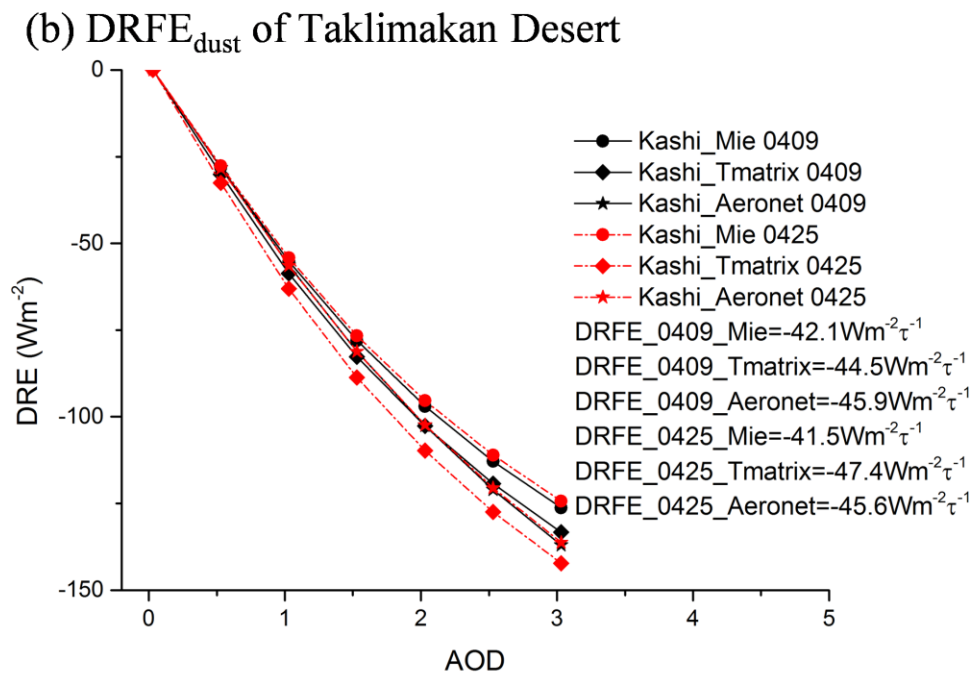

Figure 22:  $DRFE_{dust}$  simulated by the SBDART in (a) Tamanrasset and (b) Kashi.

Please see Fig.13-15 in Page 23-25 of the revised manuscript.

12. Figures 14,16: The lines in these figures are hard to distinguish.

**Reply:** Thanks for the suggestion. We have re-drawn the Figures, the symbols represents the results derived from different method, and the colors of Line-symbols represents the results in different dust storms. Please see Fig.13 in Page 23 and Fig.15 in Page 25 of the revised manuscript.

The full names of acronyms should be given as they appear for the first time and keep case consistent in the full text:

13. Line 114: the full name of sensor CERES should be given as they appear for the first time in the full text.

**Reply:** Thanks for the suggestion. The full name of sensor CERES have been given in the revised manuscript. Please see Line 124 in Page 5 of the revised manuscript.

14. Figure 3: the full name of “WSA” should be given.

**Reply:** Thanks for the suggestion. We have re-drawn the Figure 3 and provide full name of legends.

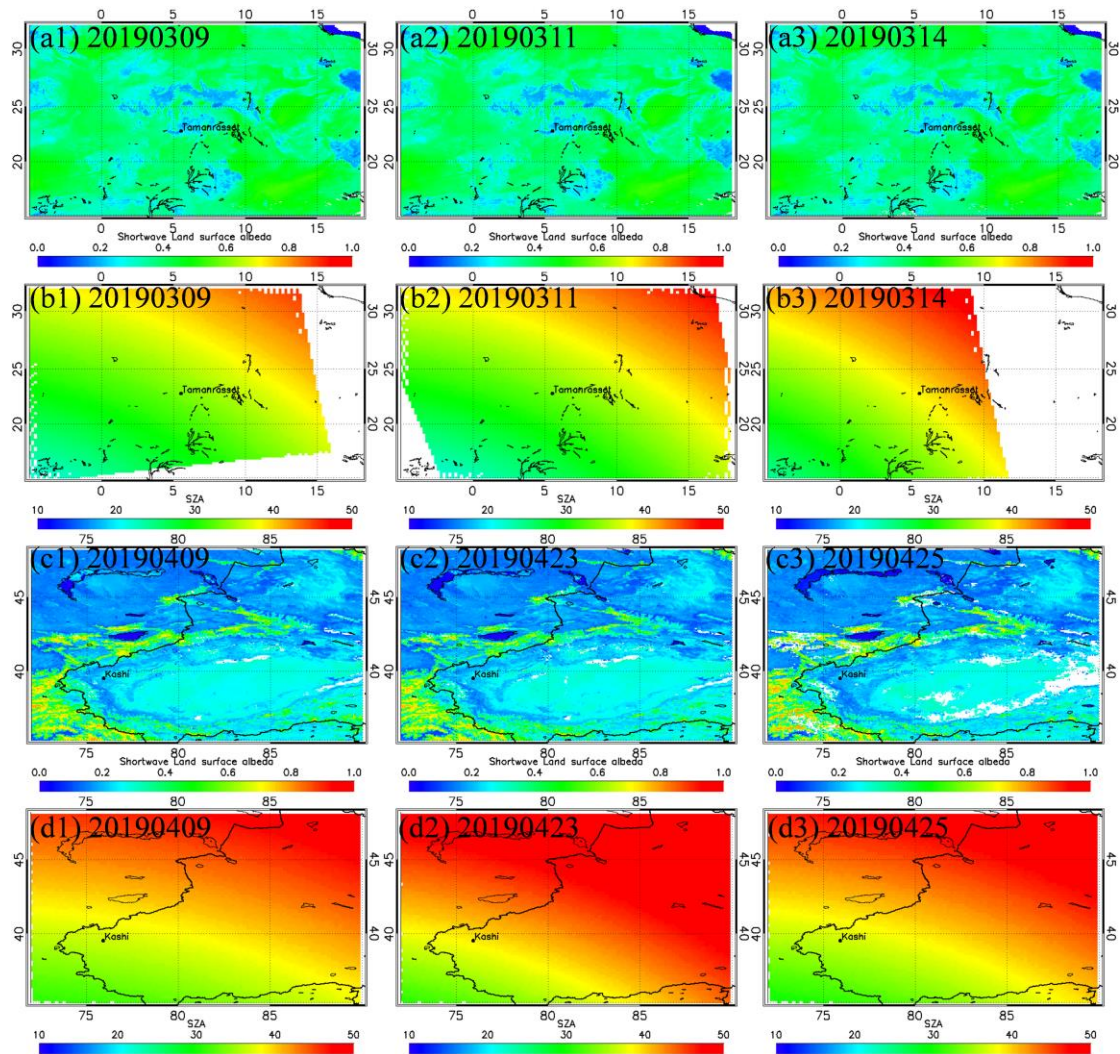

**Figure 23:** SW LSA and SZA over Sahara desert and Taklimakan desert derived from AQUA/MODIS.

Please see Fig.3 in Page 10 of the revised manuscript.

15. Lines 194-195 and some other places in the text: “Aqua” and “AQUA” are suggested keeping consistent.

**Reply:** Thank you for the suggestion, we have rewritten “Aqua” as “AQUA” to keep consistent in the revised manuscript. Please see Line 209 in Page 9 of the revised manuscript.



## References

- Christopher, S. A., Chou, J., Zhang, J., Li, X., Berendes, T. A., and Welch, R. M.: Shortwave direct radiative forcing of biomass burning aerosols estimated using VIRS and CERES data, *Geophysical Research Letters*, 27, 2197-2200, 10.1029/1999gl010923, 2000.
- Christopher, S. A., and Zhang, J.: Shortwave Aerosol Radiative Forcing from MODIS and CERES observations over the oceans, *Geophysical Research Letters*, 29, 6-1-6-4, 10.1029/2002gl014803, 2002.
- Christopher, S. A., Zhang, J., Kaufman, Y. J., and Remer, L. A.: Satellite-based assessment of top of atmosphere anthropogenic aerosol radiative forcing over cloud-free oceans, *Geophysical Research Letters*, 33, <https://doi.org/10.1029/2005GL025535>, 2006.
- Dubovik, O., and King, M. D.: A flexible inversion algorithm for retrieval of aerosol optical properties from Sun and sky radiance measurements, *Journal of Geophysical Research: Atmospheres*, 105, 20673-20696, 10.1029/2000jd900282, 2000.
- Dubovik, O., Sinyuk, A., Lapyonok, T., Holben, B. N., Mishchenko, M., Yang, P., Eck, T. F., Volten, H., Muñoz, O., Veihelmann, B., van der Zande, W. J., Leon, J.-F., Sorokin, M., and Slutsker, I.: Application of spheroid models to account for aerosol particle nonsphericity in remote sensing of desert dust, *Journal of Geophysical Research: Atmospheres*, 111, 10.1029/2005jd006619, 2006.
- García, O. E., Díaz, J. P., Expósito, F. J., Díaz, A. M., Dubovik, O., Derimian, Y., Dubuisson, P., and Roger, J. C.: Shortwave radiative forcing and efficiency of key aerosol types using AERONET data, *Atmos. Chem. Phys.*, 12, 5129-5145, 10.5194/acp-12-5129-2012, 2012.
- Guirado, C., Cuevas, E., Cachorro, V. E., Toledano, C., and Frutos, A.: Aerosol characterization at the Saharan AERONET site Tamanrasset, *Atmospheric Chemistry and Physics*, 14, 2014.
- Heald, C. L., Ridley, D. A., Kroll, J. H., Barrett, S. R. H., Cady-Pereira, K. E., Alvarado, M. J., and Holmes, C. D.: Contrasting the direct radiative effect and direct radiative forcing of aerosols, *Atmos. Chem. Phys.*, 14, 5513-5527, 10.5194/acp-14-5513-2014, 2014.
- Hsu, N. C., Tsay, S. C., King, M. D., and Herman, J. R.: Aerosol properties over bright-reflecting source regions, *IEEE Transactions on Geoscience & Remote Sensing*, 42, 557-569, 2004.
- Huang, J., Fu, Q., Su, J., and Tang, Q.: Taklimakan dust aerosol radiative heating derived from CALIPSO observations using the Fu-Liou radiation model with CERES constraints, *Atmospheric Chemistry and Physics Discussions*, 2009.
- Jose, S., Gharai, B., Rao, P. V. N., and Dutt, C. B. S.: Satellite-based shortwave aerosol radiative forcing of dust storm over the Arabian Sea, *Atmospheric Science Letters*, 17, 43-50, <https://doi.org/10.1002/asl.597>, 2016a.
- Jose, S., Gharai, B., Rao, P. V. N., and Dutt, C. B. S.: Satellite - based shortwave aerosol radiative forcing of dust storm over the Arabian Sea, *Atmospheric Science Letters*, 17, 43-50, 2016b.
- Lewis, P., and Barnsley, M.: Influence of the sky radiance distribution on various formulations of the Earth surface albedo, *Proc. Conf. Phys. Meas. Sign. Remote Sens.*, 1994.
- Li, F., Vogelmann, A. M., and Ramanathan, V.: Saharan Dust Aerosol Radiative Forcing Measured from Space, *Journal of Climate*, 17, 2558-2571, 10.1175/1520-0442(2004)017<2558:SDARFM>2.0.CO;2, 2004.
- Li, L., Li, Z., Chang, W., Ou, Y., Goloub, P., Li, C., Li, K., Hu, Q., Wang, J., and Wendisch, M.: Aerosol solar radiative forcing near the Taklimakan Desert based on radiative transfer and regional meteorological simulations during the Dust Aerosol Observation-Kashi campaign, *Atmos. Chem. Phys.*,

20, 10845-10864, 10.5194/acp-20-10845-2020, 2020.

Lin, C., Guang-Yu, S., Ling-Zhi, Z., and Sai-Chun, T.: Assessment of Dust Aerosol Optical Depth and Shortwave Radiative Forcing over the Northwest Pacific Ocean in Spring Based on Satellite Observations, *Atmospheric and Oceanic Science Letters*, 2009.

Ramaswamy, V.: IPCC Third Assessment Report - Chapter 6 - Radiative Forcing of Climate Change, 2006.

Remer, L. A., Kaufman, Y. J., Tanré D., Mattoo, S., Chu, D. A., Martins, J. V., Li, R. R., Ichoku, C., Levy, R. C., Kleidman, R. G., Eck, T. F., Vermote, E., and Holben, B. N.: The MODIS Aerosol Algorithm, Products, and Validation, *Journal of the Atmospheric Sciences*, 62, 947-973, 10.1175/JAS3385.1, 2005.

Satheesh, S. K., and Ramanathan, V.: Large differences in tropical aerosol forcing at the top of the atmosphere and Earth's surface, *Nature*, 405, 60-63, 10.1038/35011039, 2000.

Schaaf, C. B., Gao, F., Strahler, A. H., Lucht, W., Li, X., Tsang, T., Strugnell, N. C., Zhang, X., Jin, Y., Muller, J.-P., Lewis, P., Barnsley, M., Hobson, P., Disney, M., Roberts, G., Dunderdale, M., Doll, C., d'Entremont, R. P., Hu, B., Liang, S., Privette, J. L., and Roy, D.: First operational BRDF, albedo nadir reflectance products from MODIS, *Remote Sensing of Environment*, 83, 135, 10.1016/s0034-4257(02)00091-3, 2002.

Tian, L., Zhang, P., and Chen, L.: Estimation of the Dust Aerosol Shortwave Direct Forcing Over Land Based on an Equi-albedo Method From Satellite Measurements, *Journal of Geophysical Research: Atmospheres*, 124, 8793-8807, 10.1029/2019JD030974, 2019.

Wielicki, B. A., Barkstrom, B. R., Baum, B. A., Charlock, T. P., Green, R. N., Kratz, D. P., Lee, R. B., Minnis, P., Smith, G. L., Takmeng, W., Young, D. F., Cess, R. D., Coakley, J. A., Crommelynck, D. A. H., Donner, L., Kandel, R., King, M. D., Miller, A. J., Ramanathan, V., Randall, D. A., Stowe, L. L., and Welch, R. M.: Clouds and the Earth's Radiant Energy System (CERES): algorithm overview, *IEEE Transactions on Geoscience and Remote Sensing*, 36, 1127-1141, 1998.

Xia, X., and Zong, X.: Shortwave versus longwave direct radiative forcing by Taklimakan dust aerosols, *Geophysical Research Letters*, 36, 10.1029/2009gl037237, 2009.

Zhang, J., and Christopher, S. A.: Longwave radiative forcing of Saharan dust aerosols estimated from MODIS, MISR, and CERES observations on Terra, *Geophysical Research Letters*, 30, <https://doi.org/10.1029/2003GL018479>, 2003.
